# Supplementary material for: Selective reduction of condensed N-heterocycles using water as a solvent and a hydrogen source
Source: Royal Society of Chemistry journal article supplement (doi:10.1039/c2ob26903a), 2012-12-14

## **Selective reduction of condensed N-heterocycles using water as solvent and hydrogen source**

Hyejin Cho, Fanni Török and Béla Török\*

\* To whom correspondence should be addressed

Béla Török, email: [belatorok@umb.edu](mailto:belatorok@umb.edu), Phone: 617-287-6159

*Department of Chemistry, University of Massachusetts Boston, 100 Morrissey Blvd. Boston,*

*MA 02125, USA.*

$^1\text{H}$  NMR of **1**

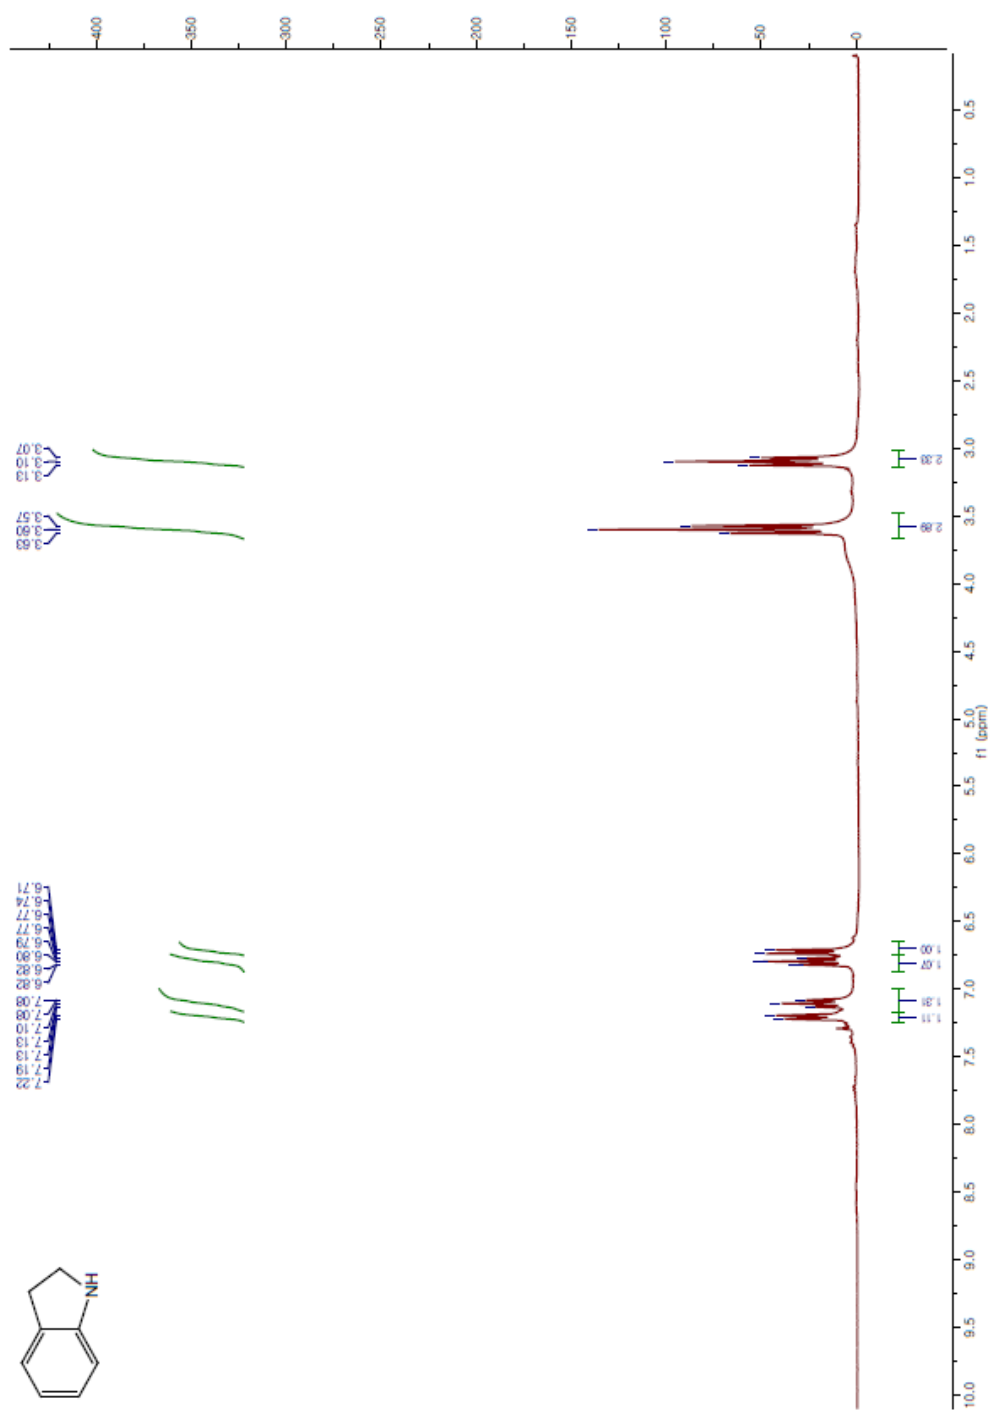

$^{13}\text{C}$  NMR of **1**

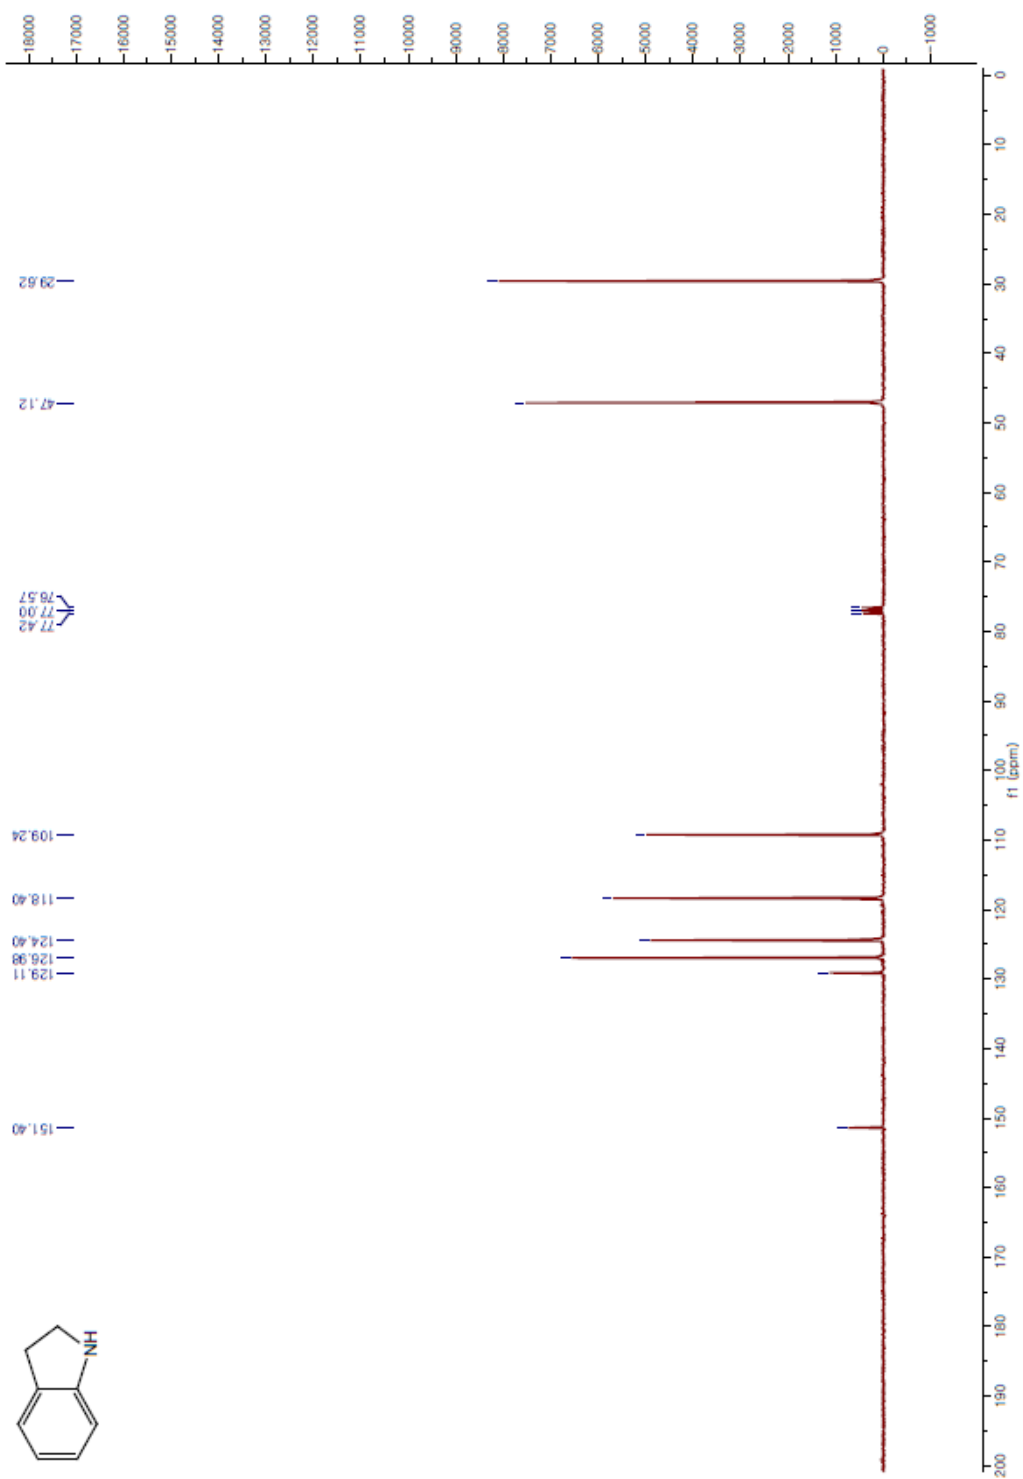

$^1\text{H}$  NMR of 2

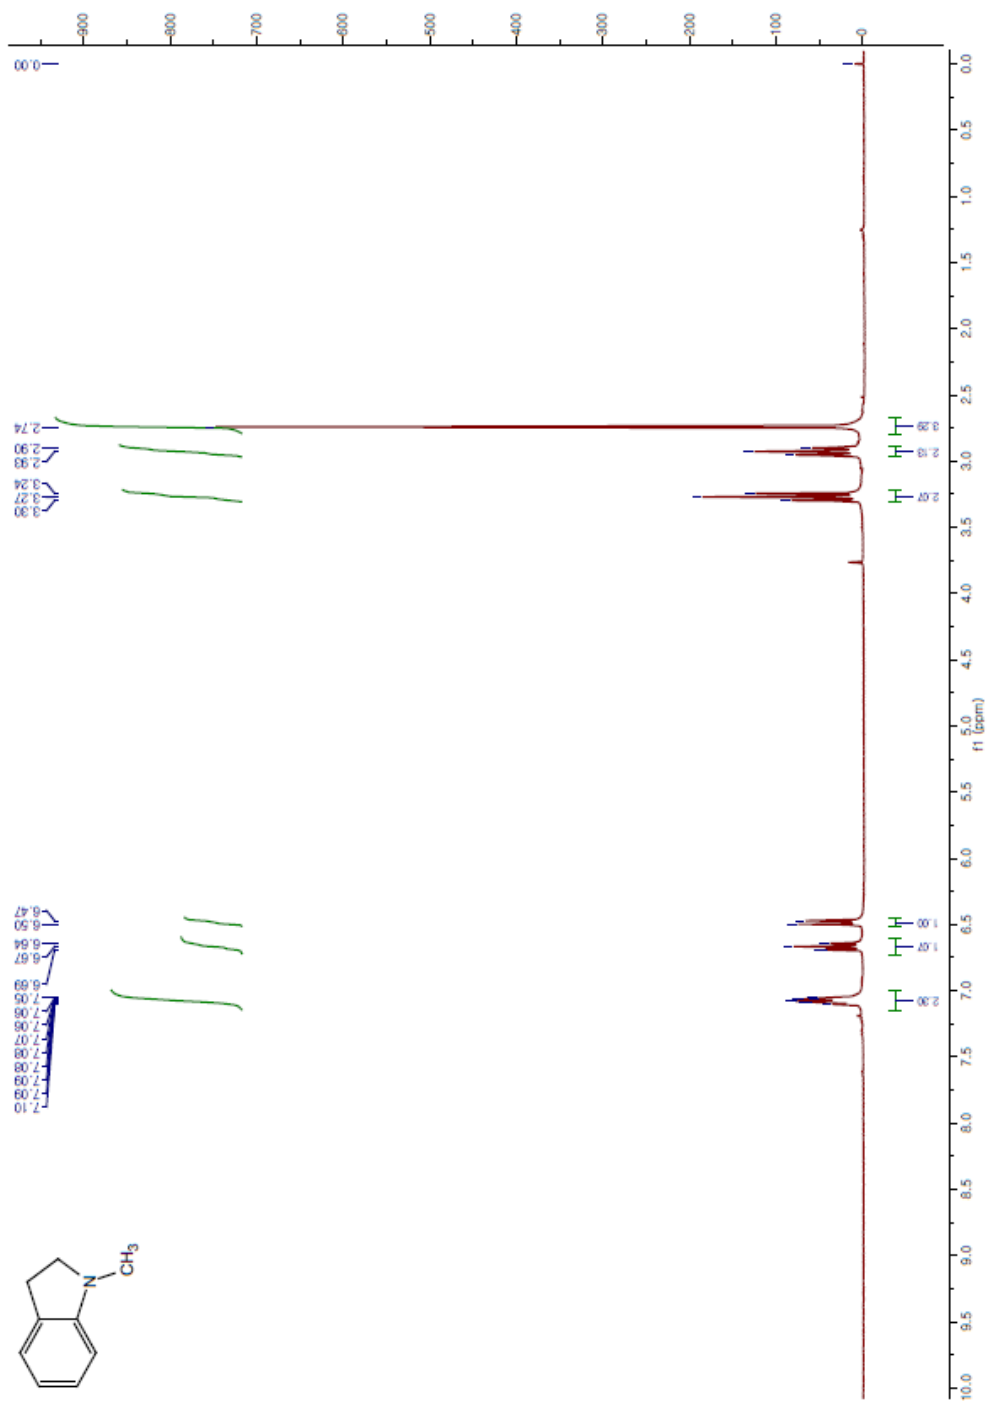

$^{13}\text{C}$  NMR of 2

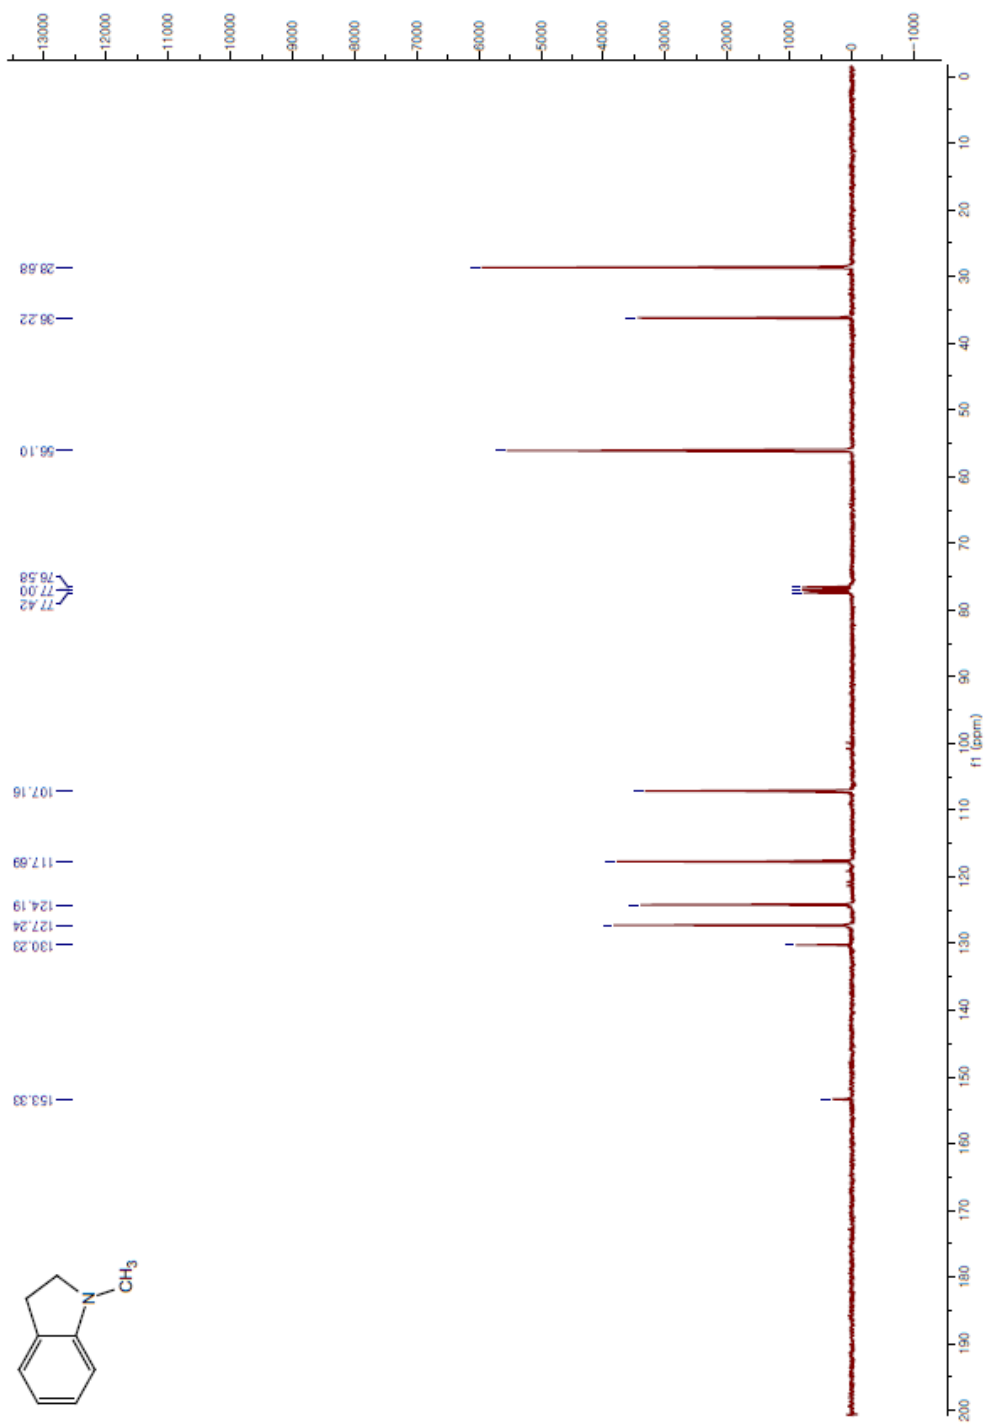

<sup>1</sup>H NMR of 3

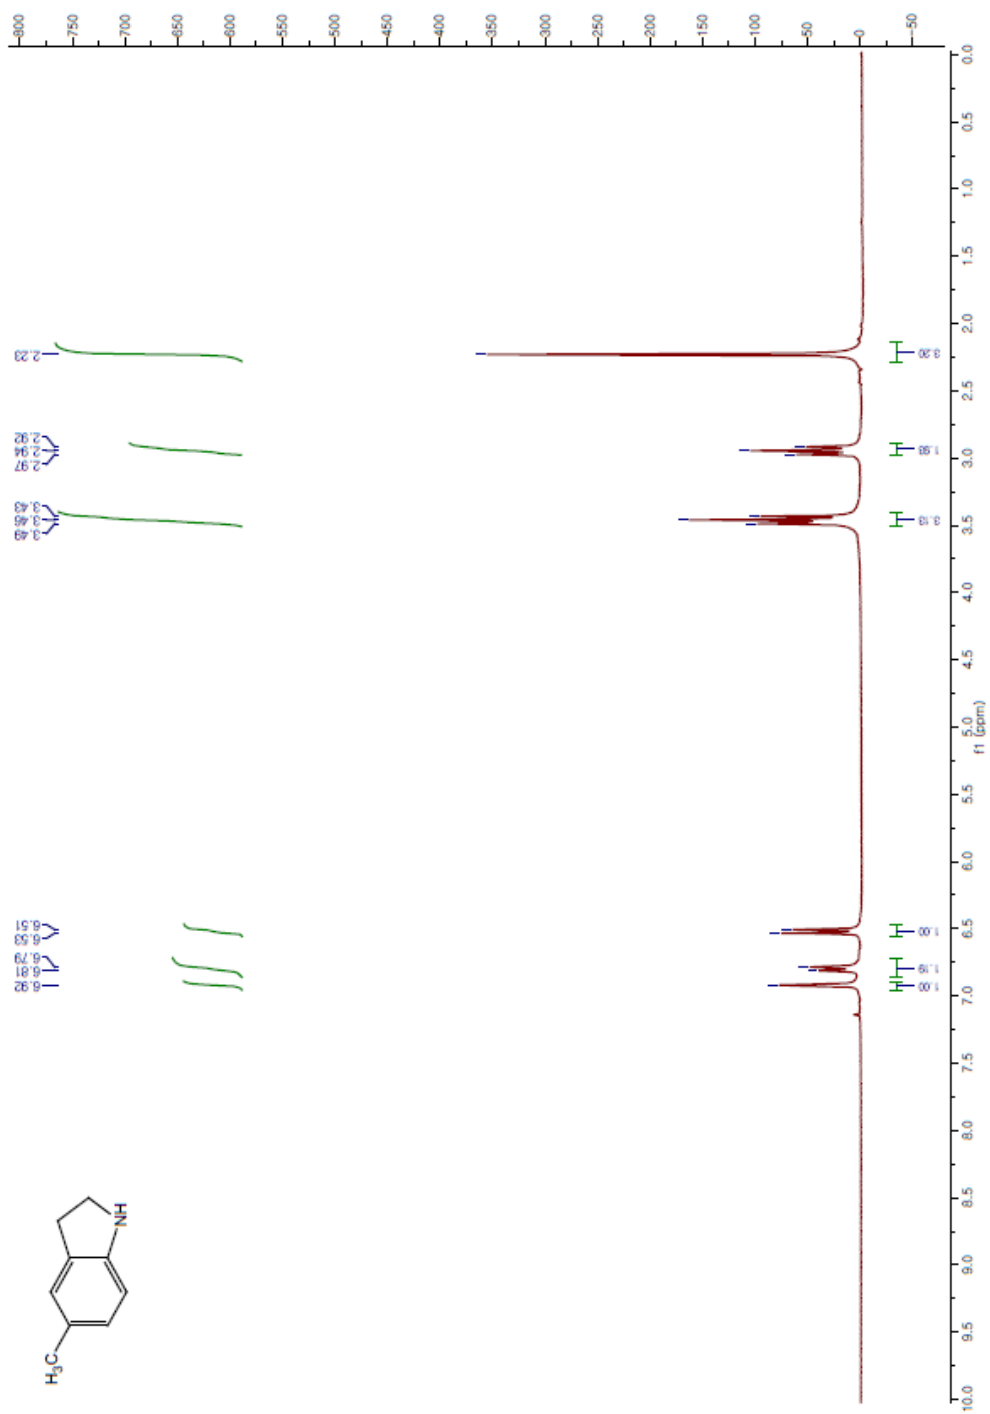

<sup>13</sup>C NMR of **3**

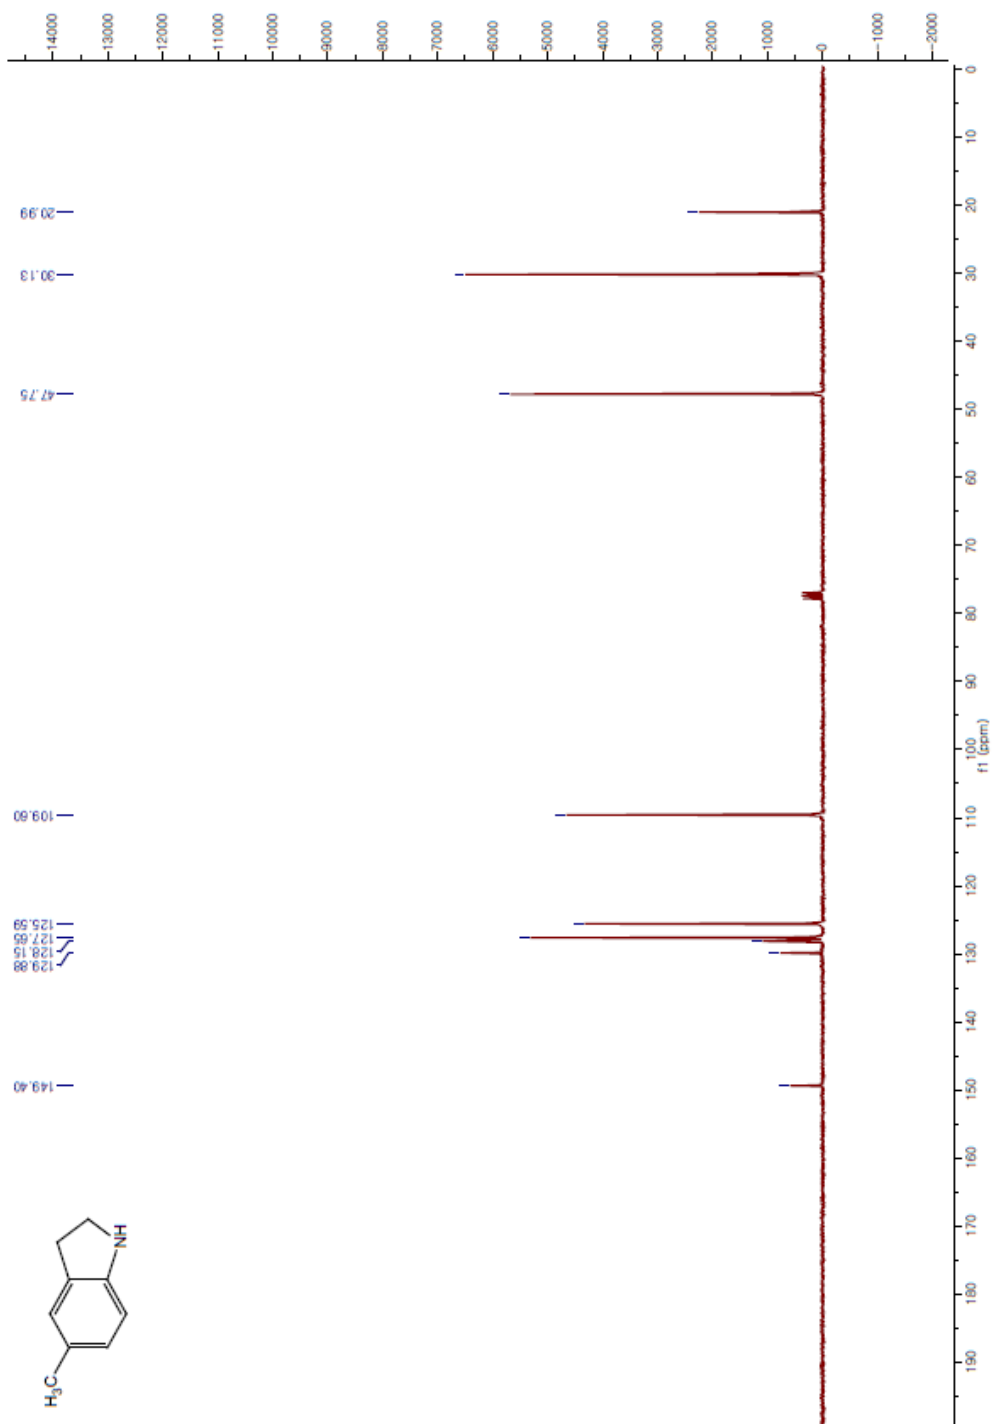

<sup>1</sup>H NMR of 4

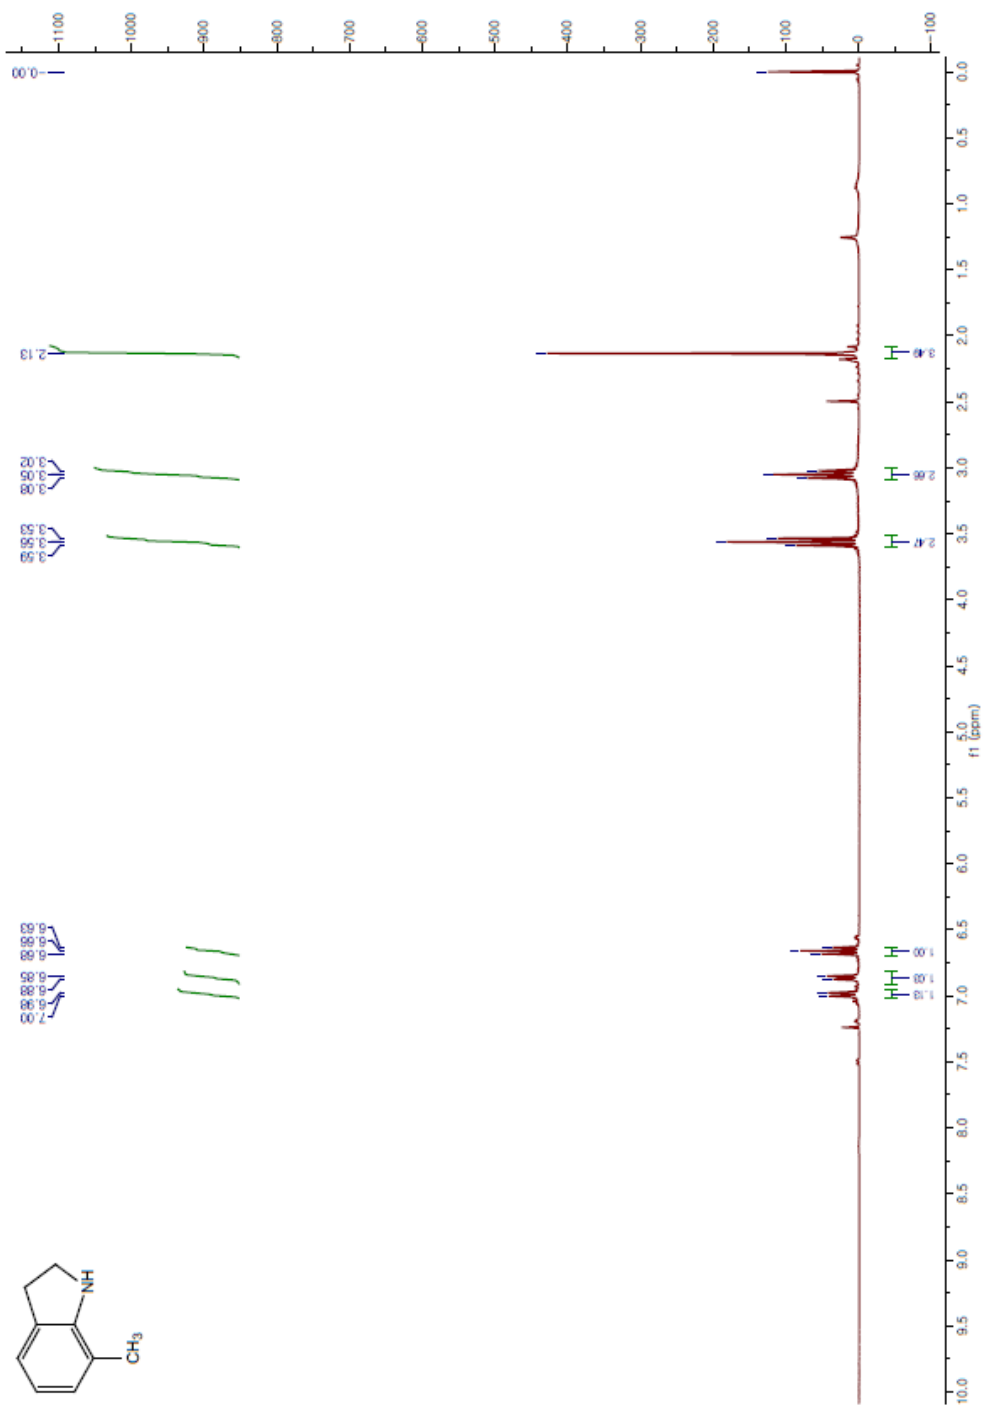



$^{13}\text{C}$  NMR of 4

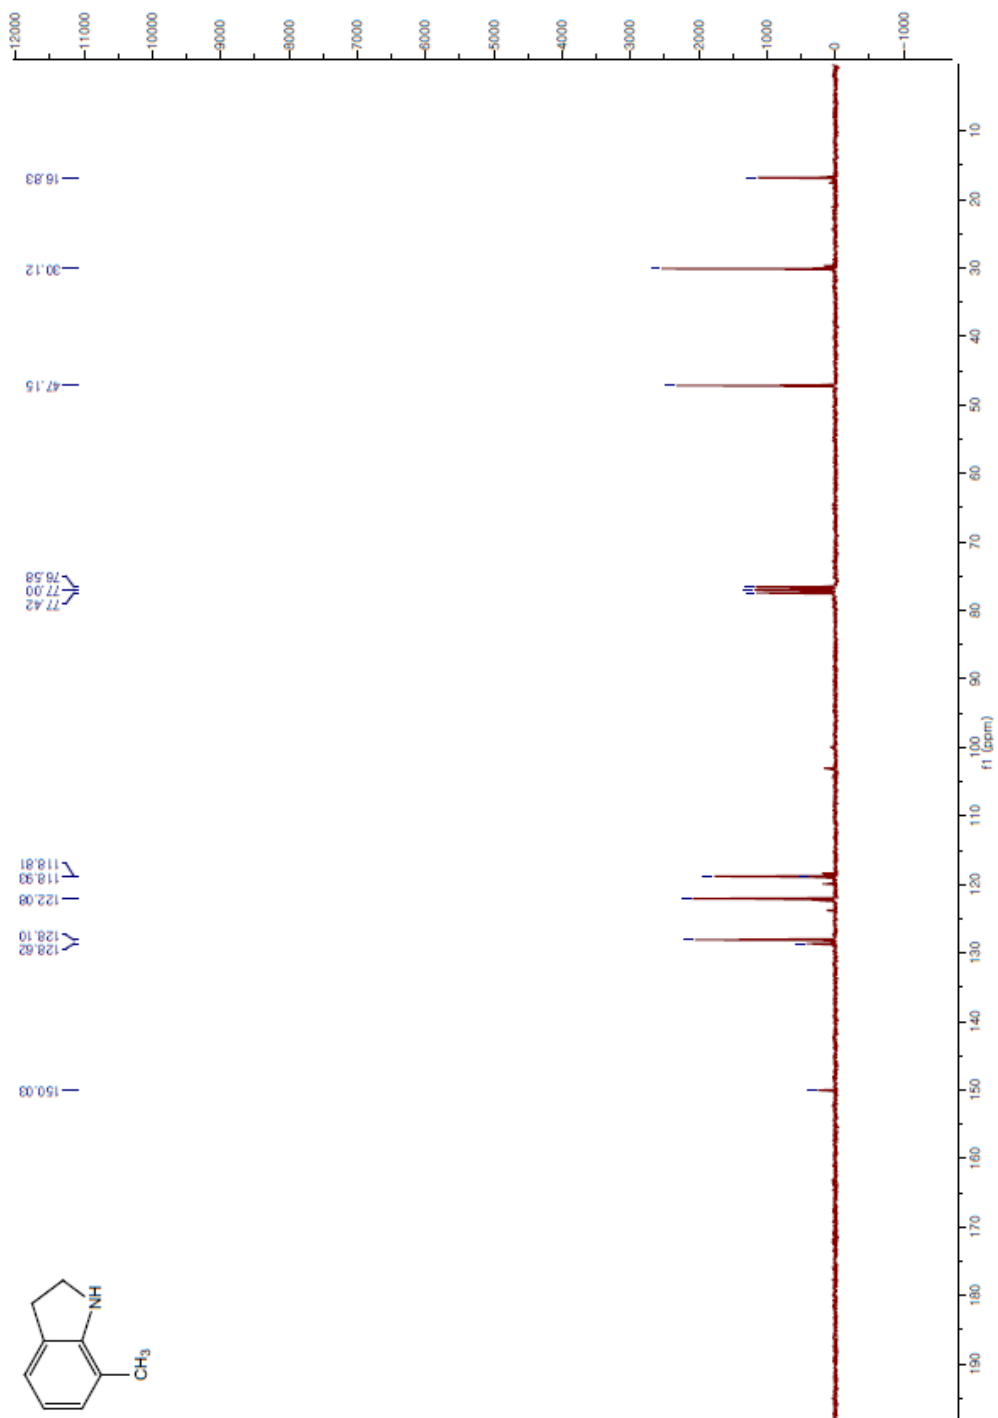

<sup>1</sup>H NMR of 5

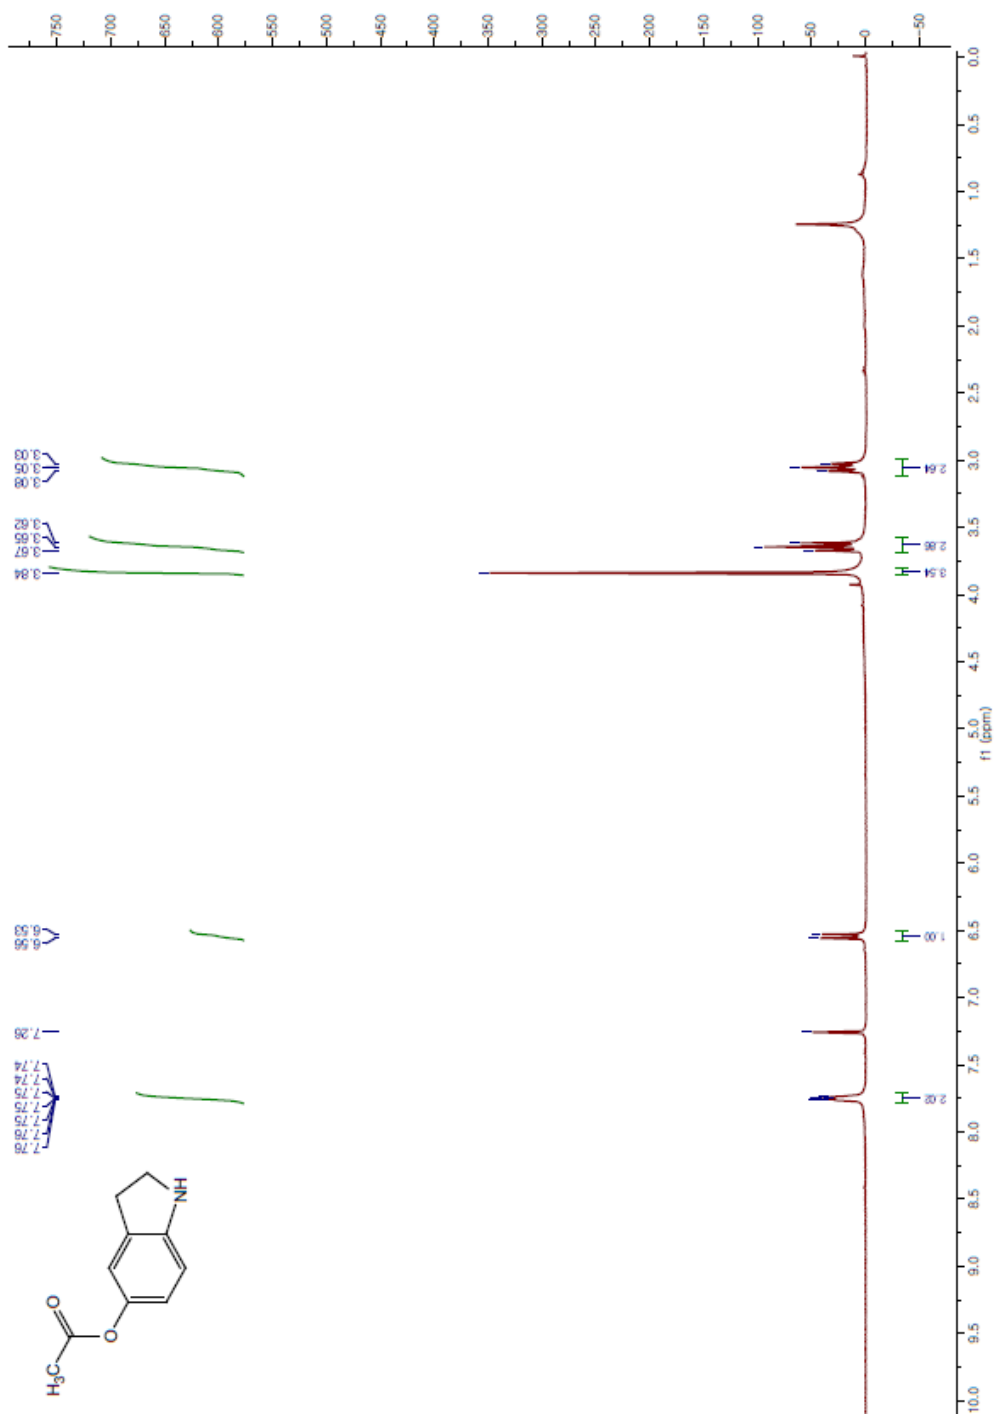

$^{13}\text{C}$  NMR of **5**

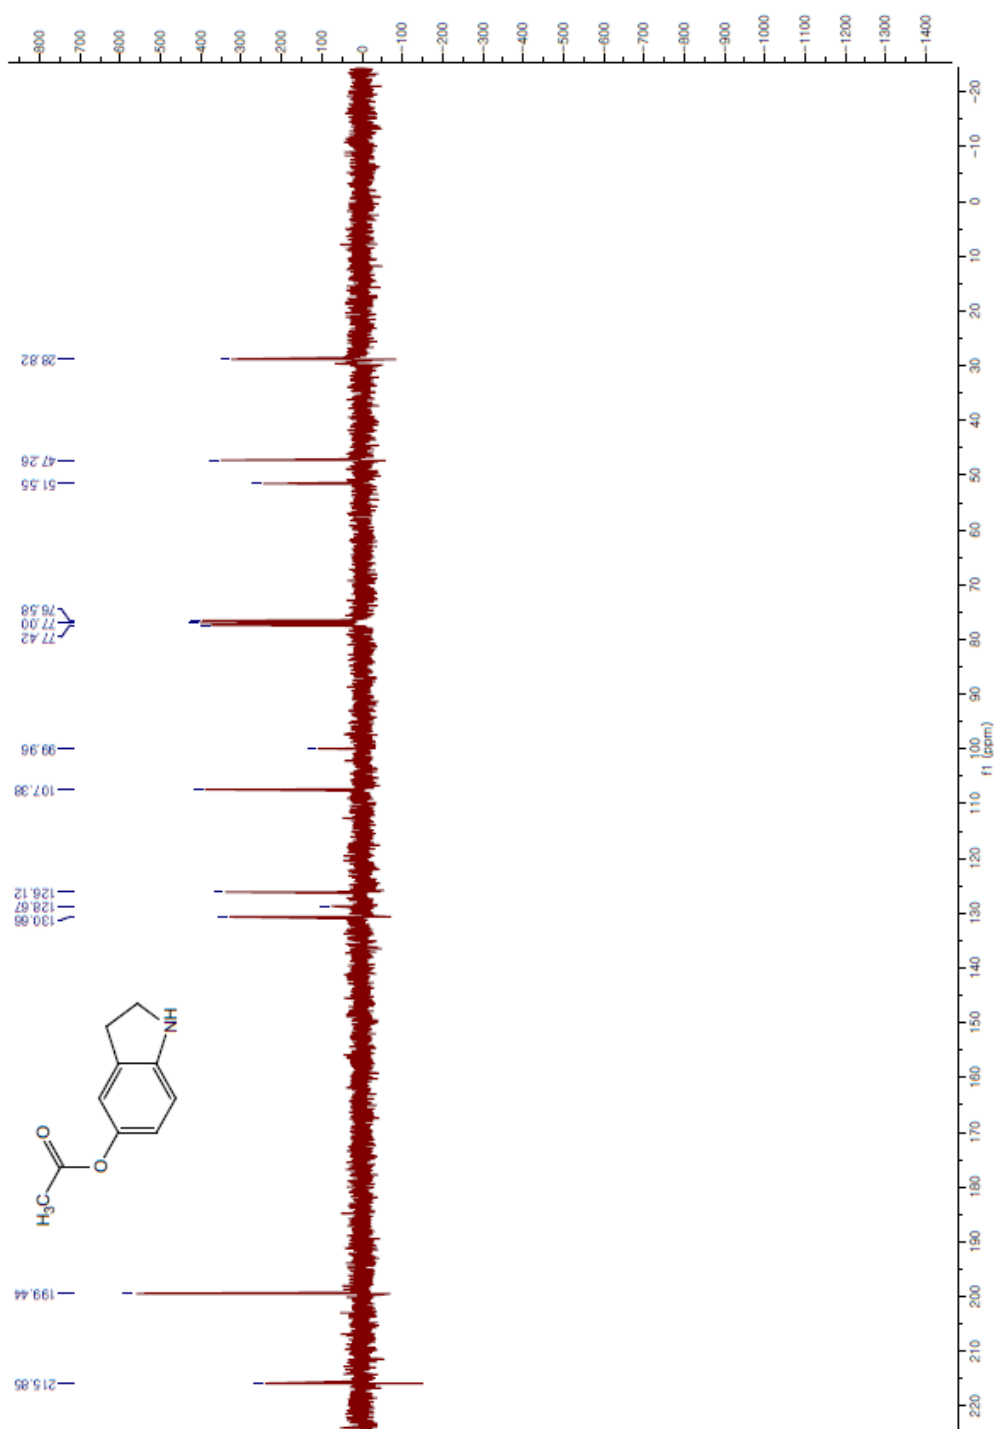

<sup>1</sup>H NMR of 6

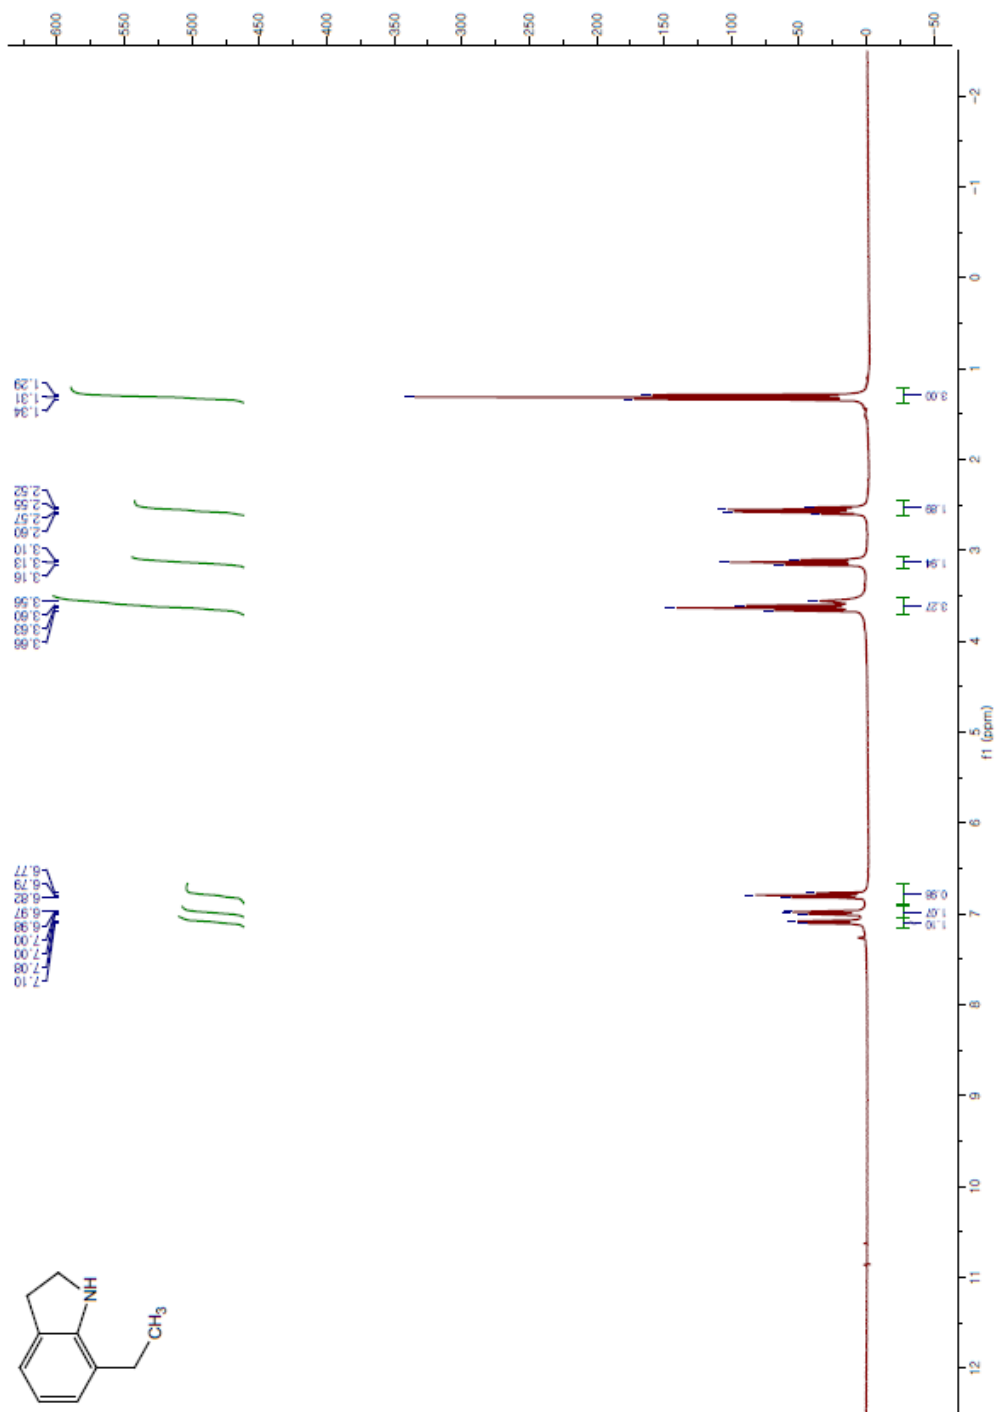

$^{13}\text{C}$  NMR of **6**

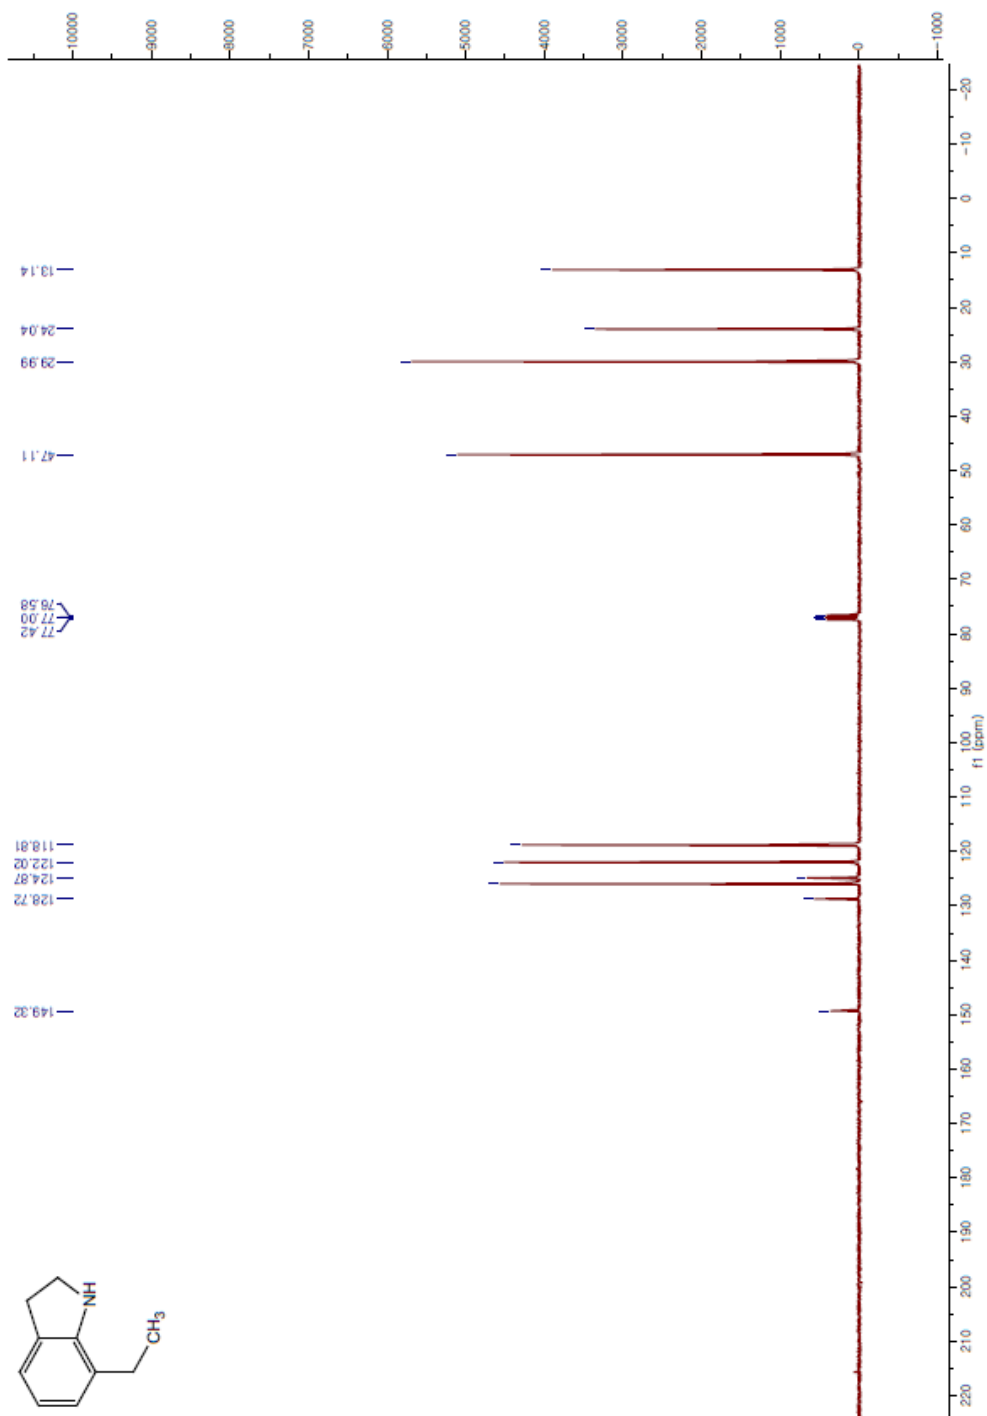

<sup>1</sup>H NMR of 7

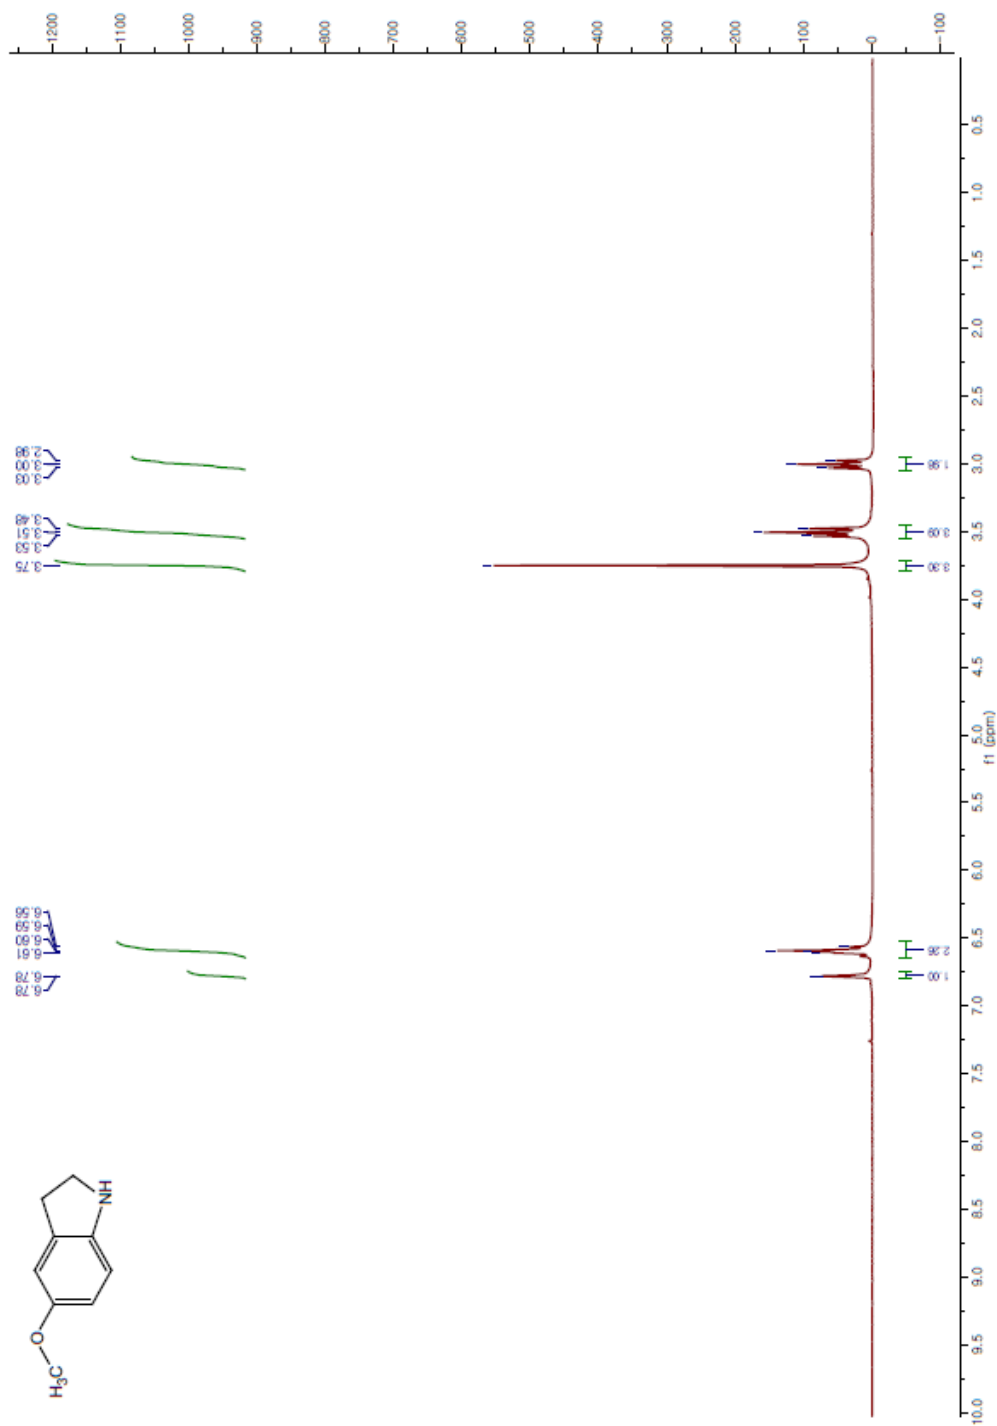

$^{13}\text{C}$  NMR of 7

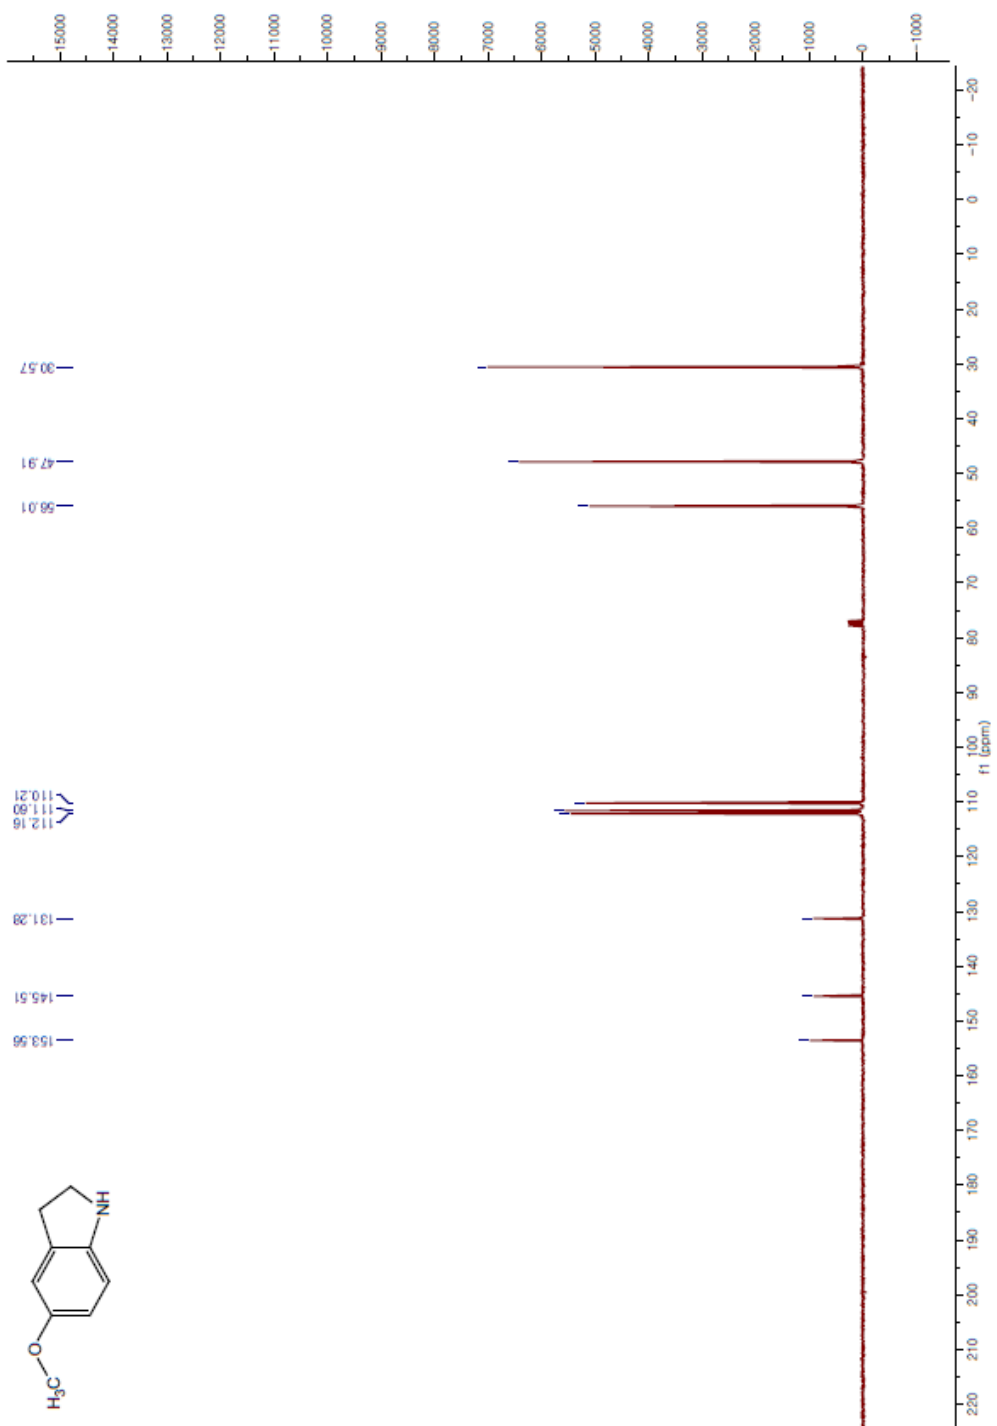

$^1\text{H}$  NMR of **8**

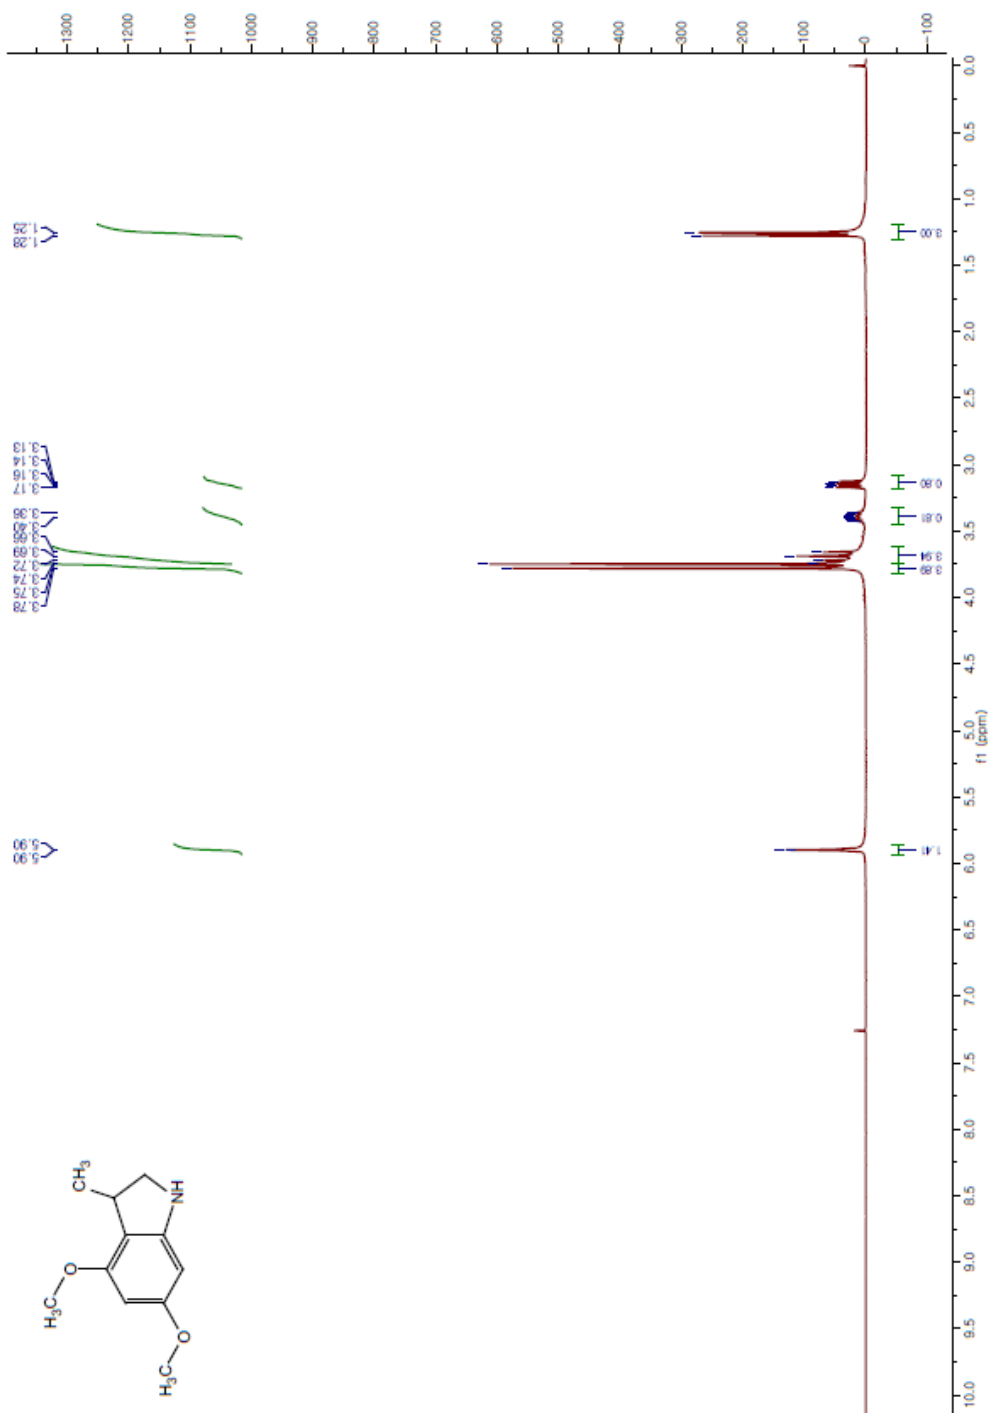



$^{13}\text{C}$  NMR of **8**

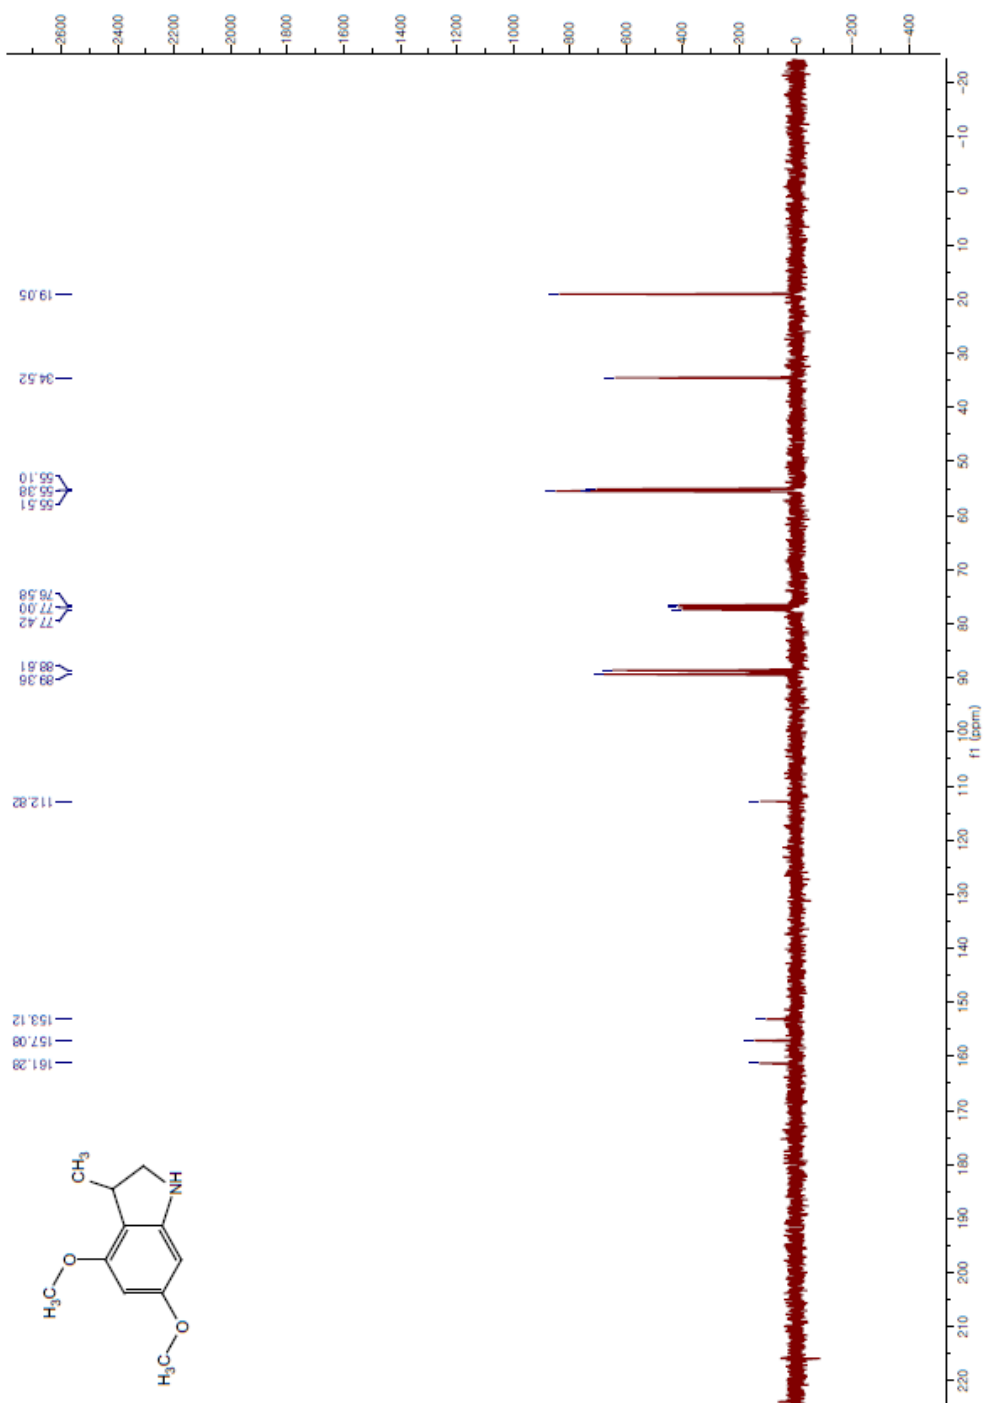

<sup>1</sup>H NMR of **9**

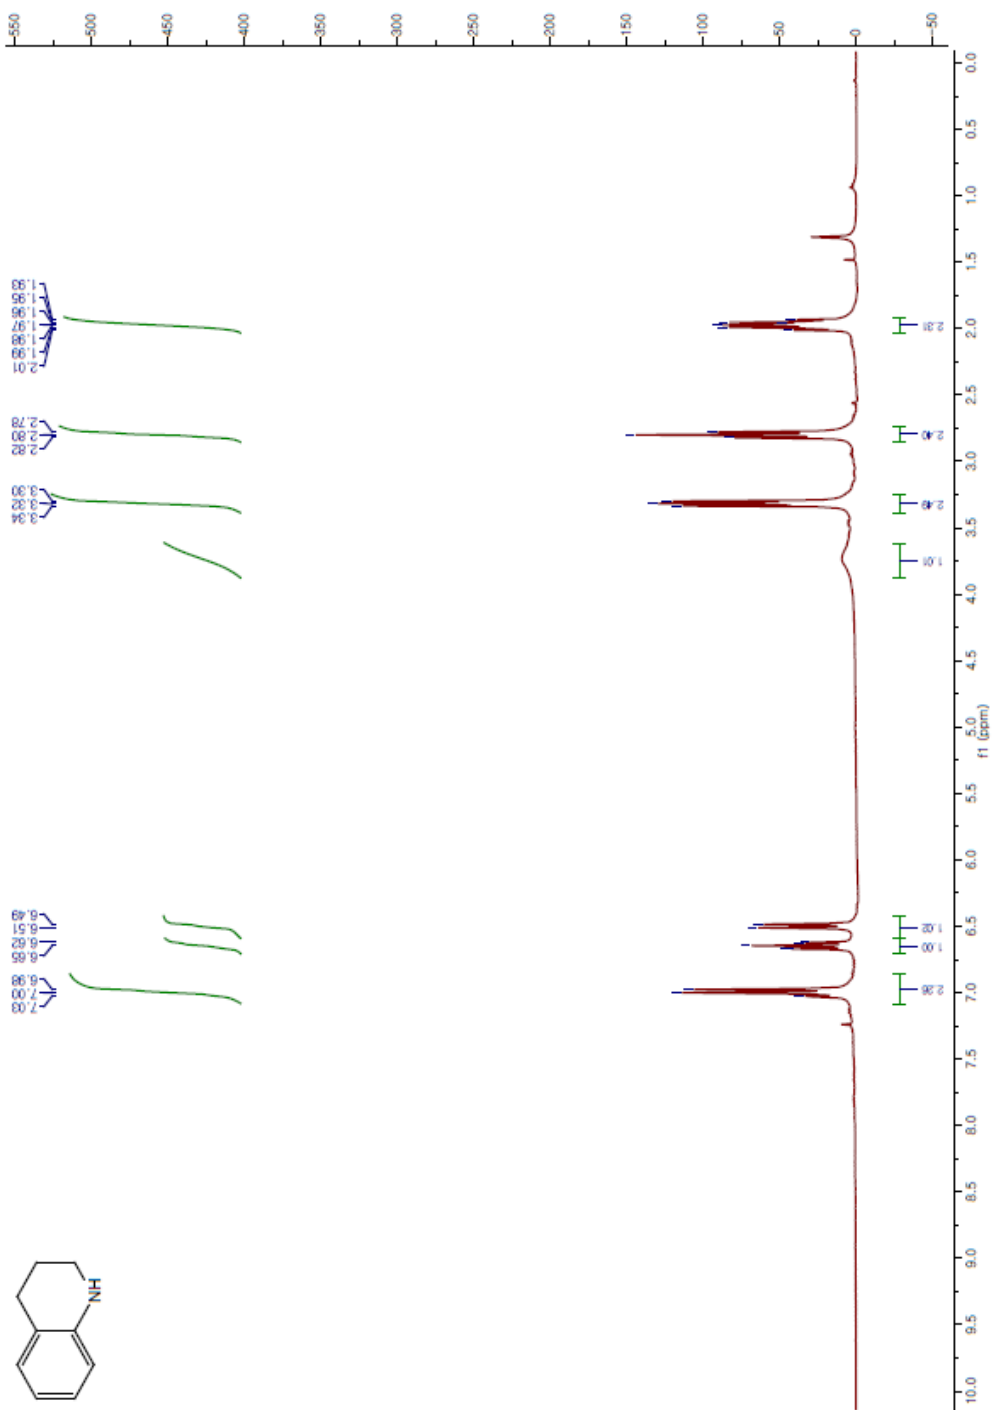

$^{13}\text{C}$  NMR of **9**

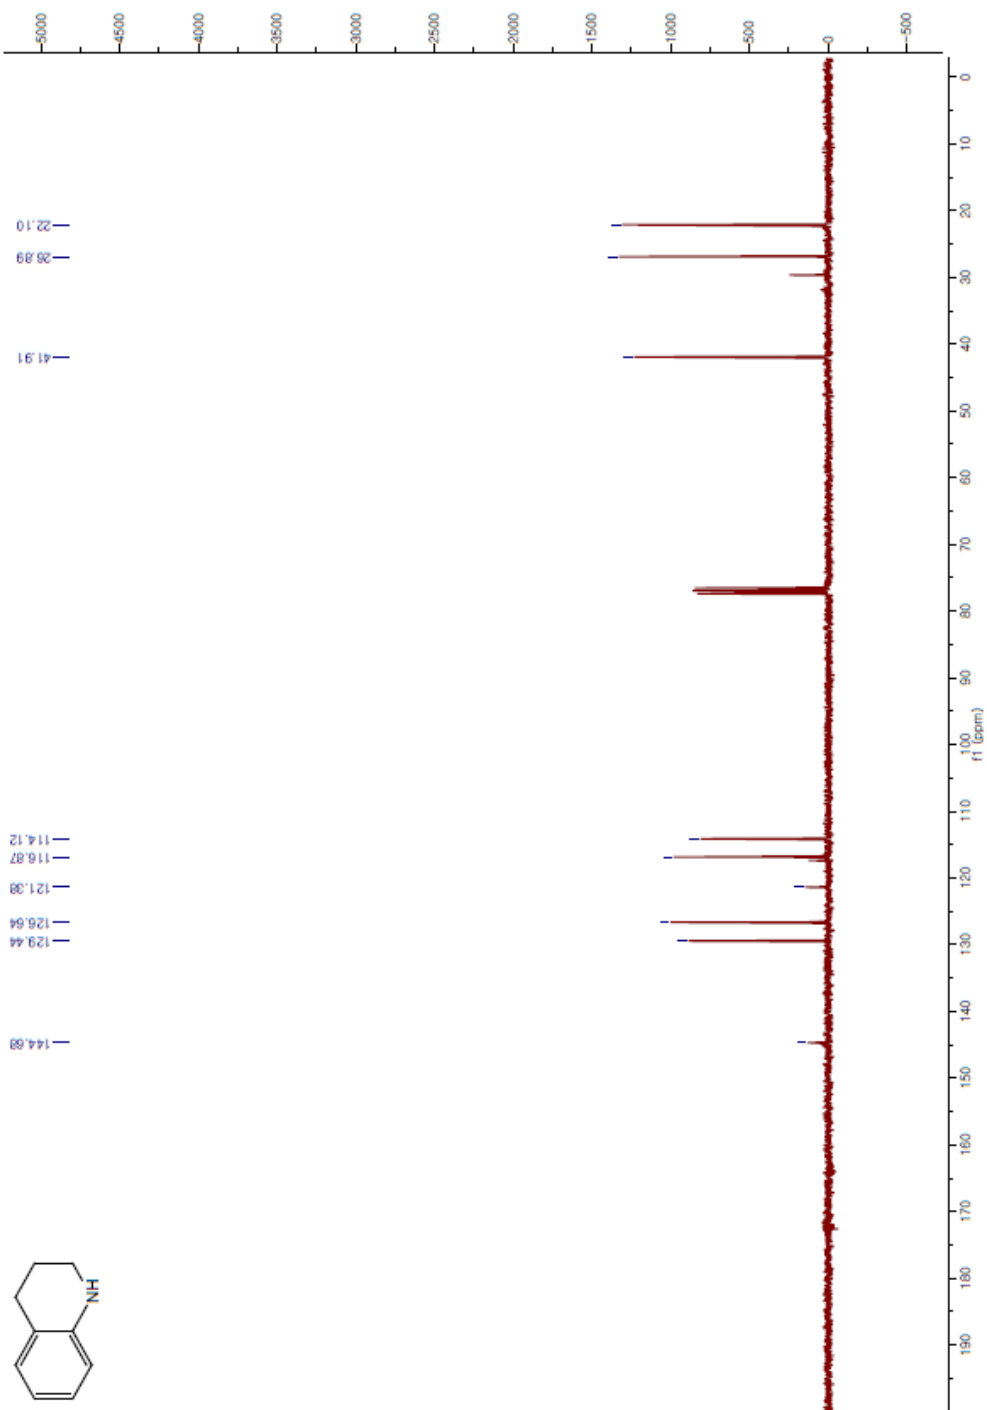

$^1\text{H}$  NMR of **10**

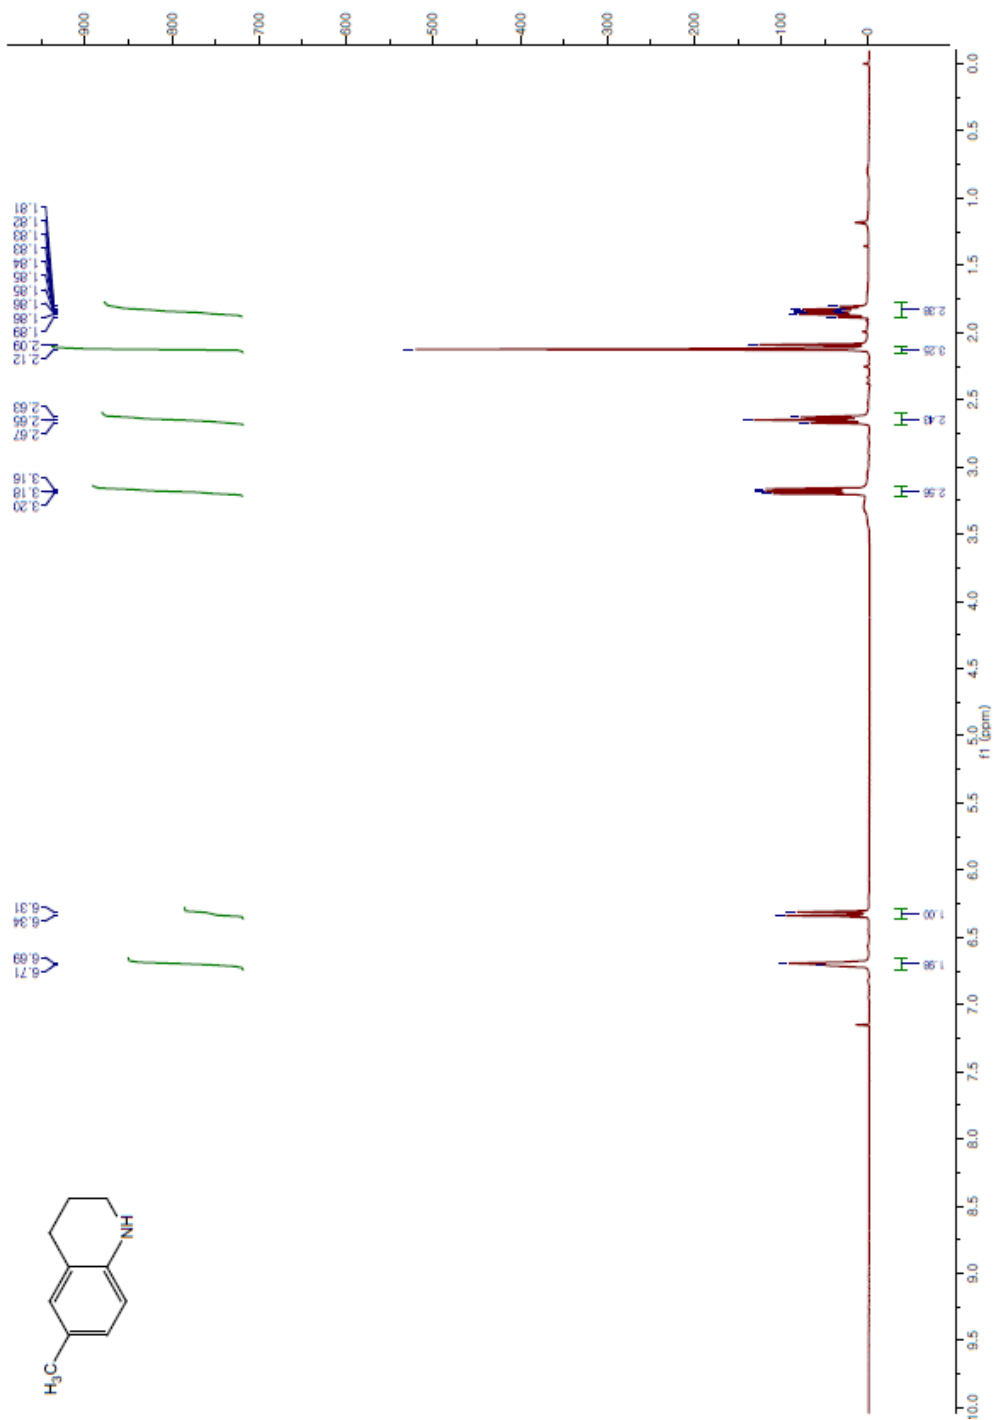

$^{13}\text{C}$  NMR of **10**

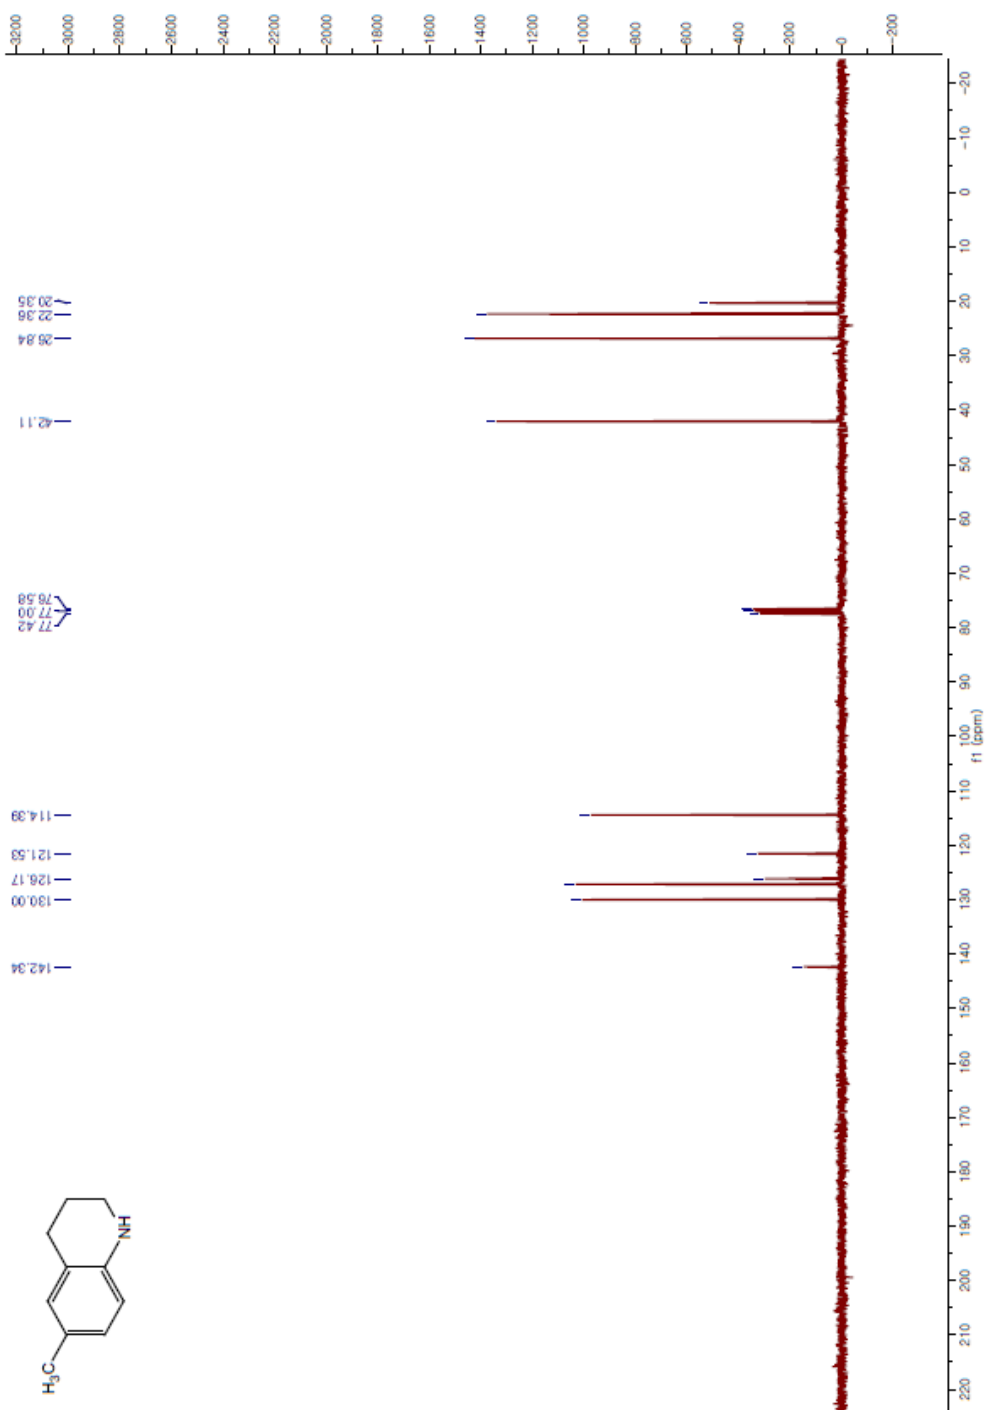

<sup>1</sup>H NMR of **11**

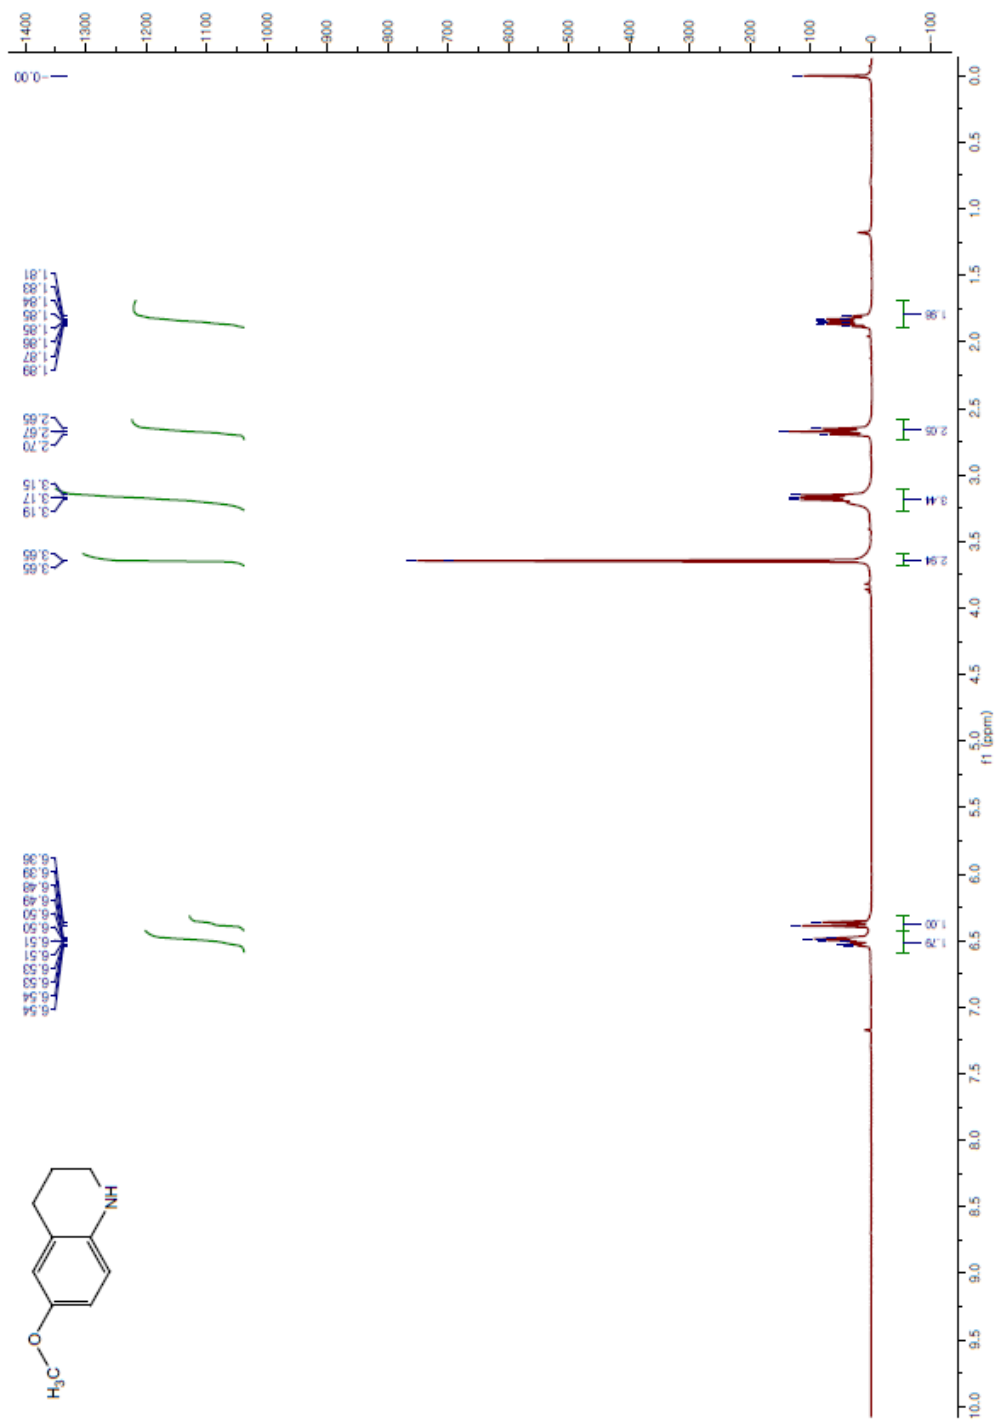

$^{13}\text{C}$  NMR of **11**

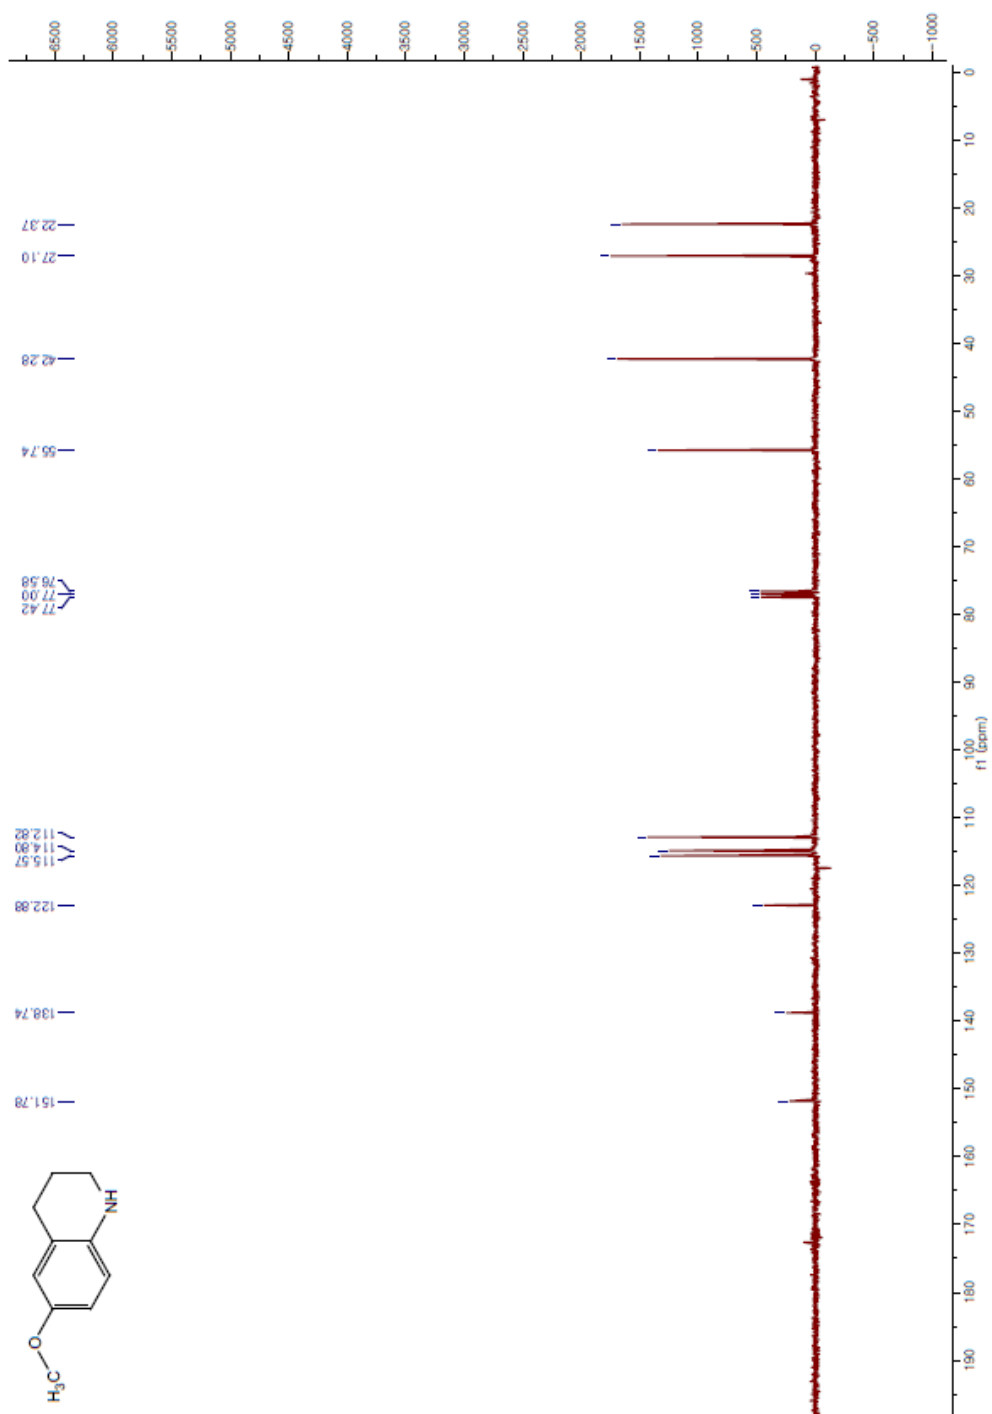

<sup>1</sup>H NMR of 12

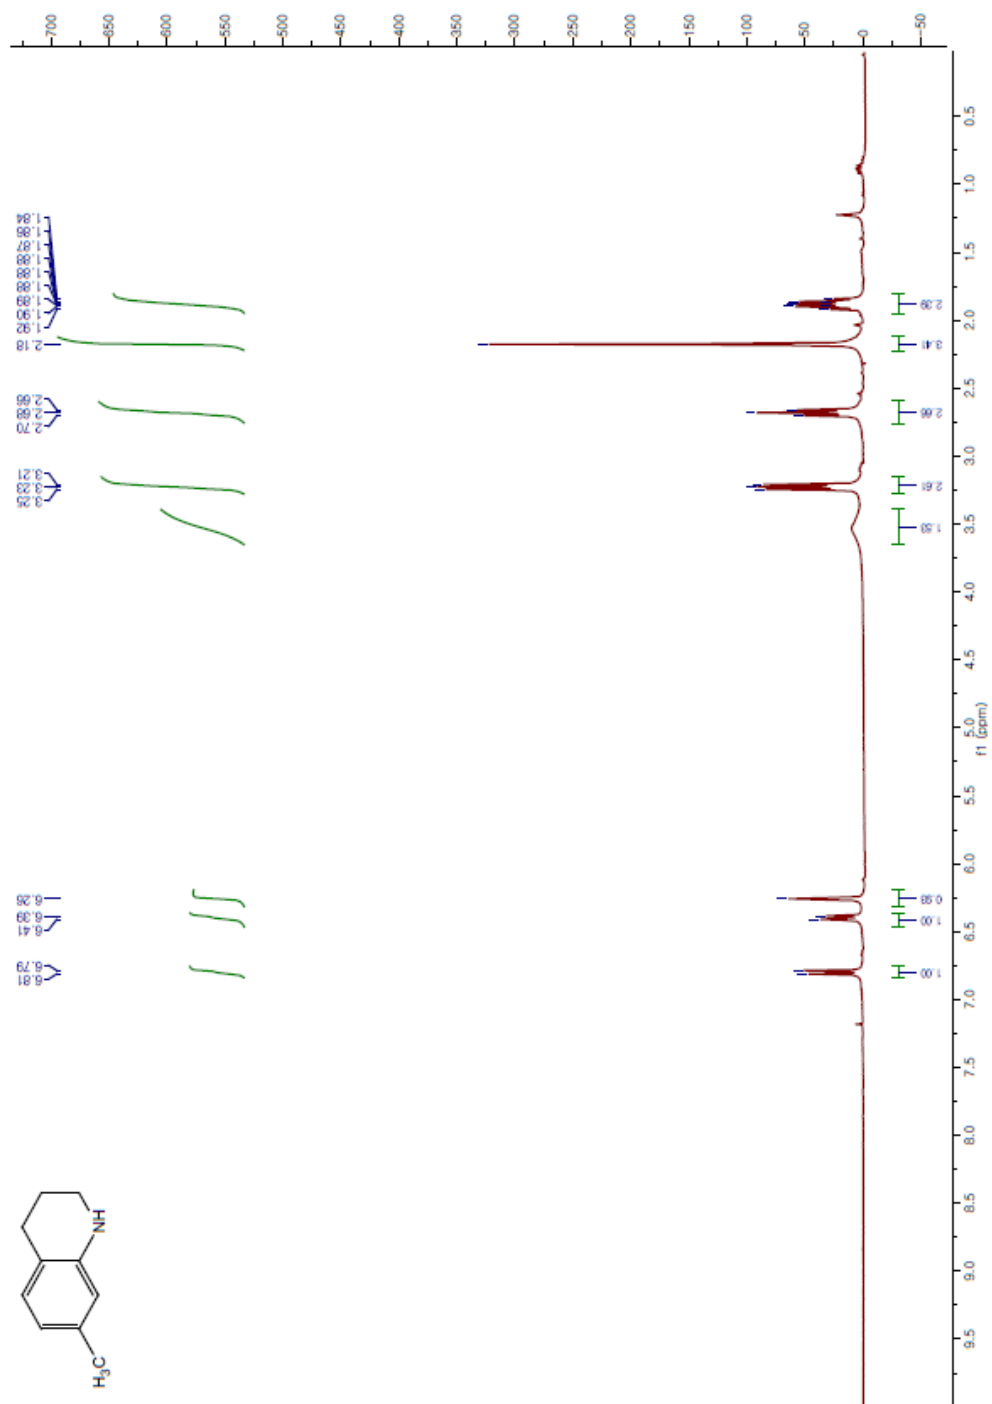



$^{13}\text{C}$  NMR of 12

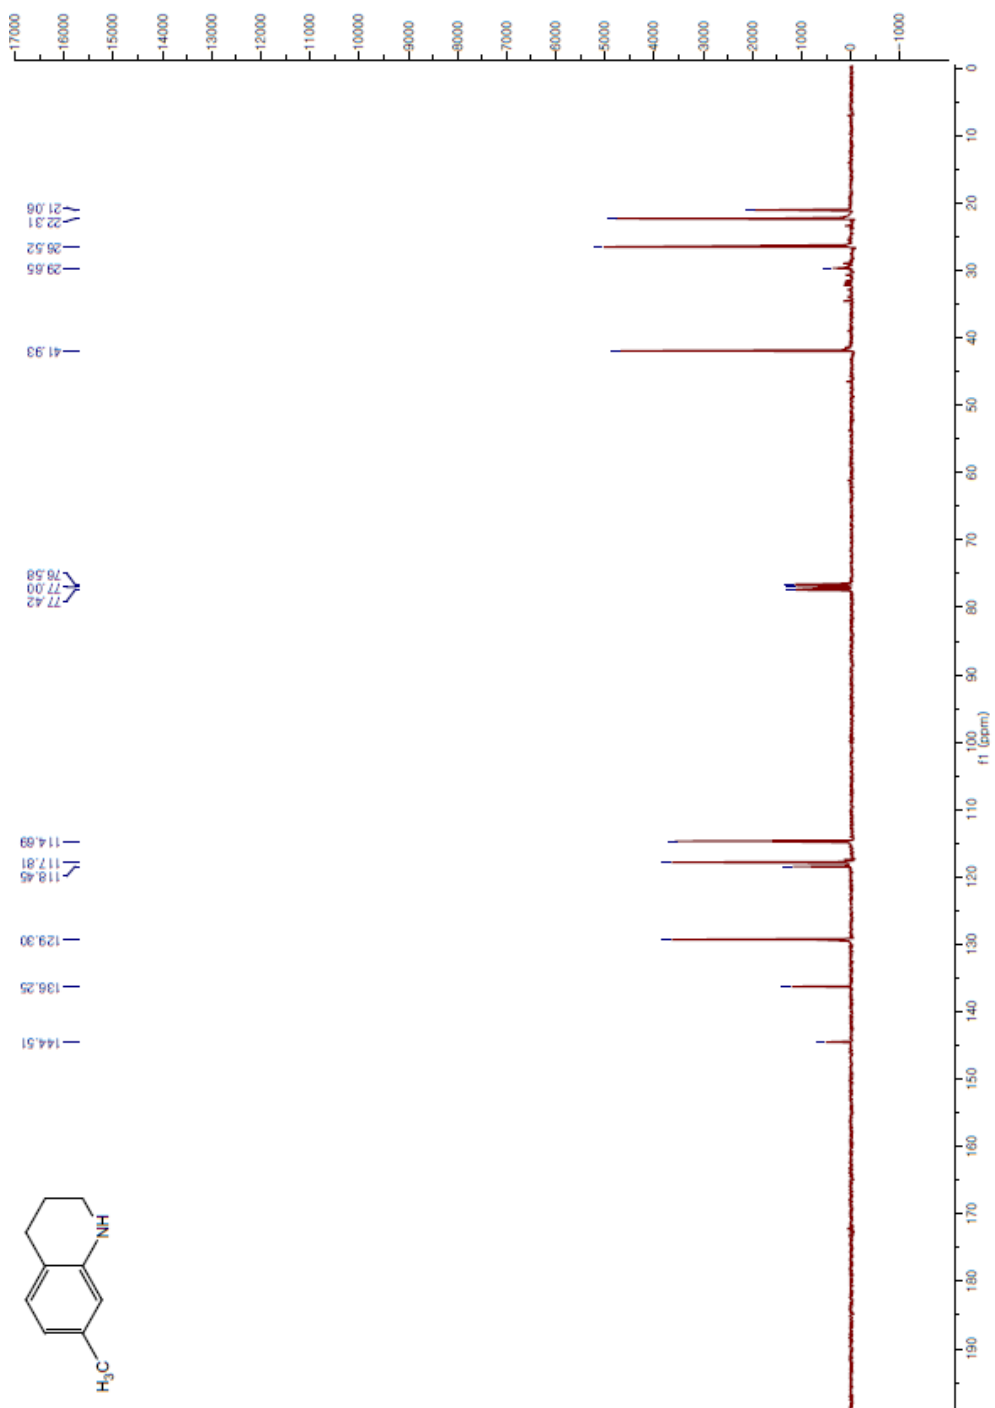

<sup>1</sup>H NMR of 13

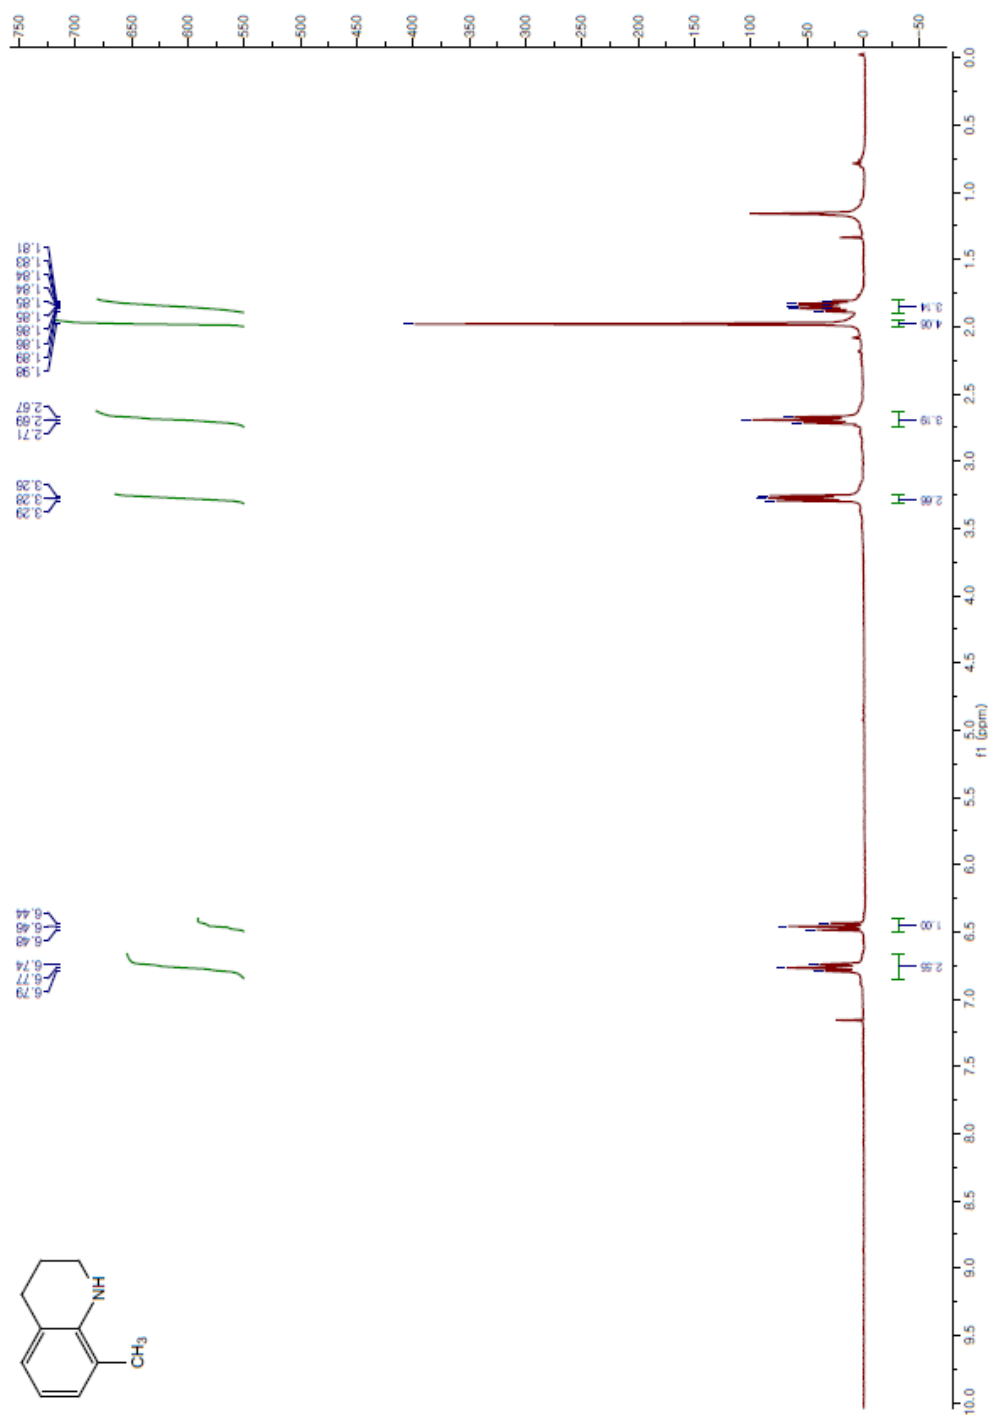

$^{13}\text{C}$  NMR of **13**

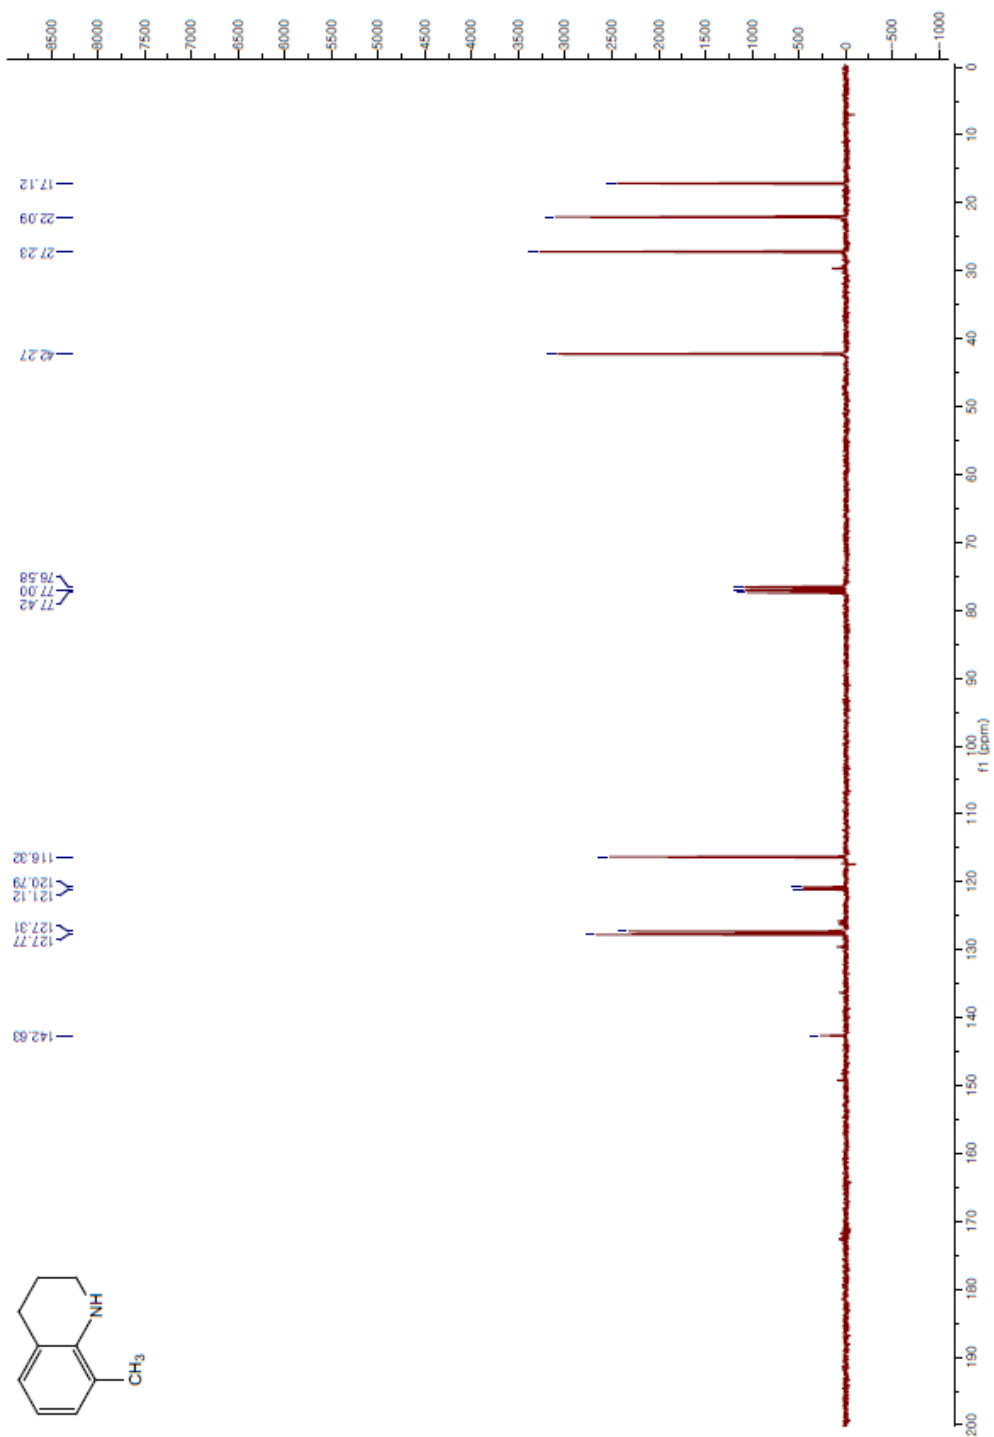

<sup>1</sup>H NMR of 14

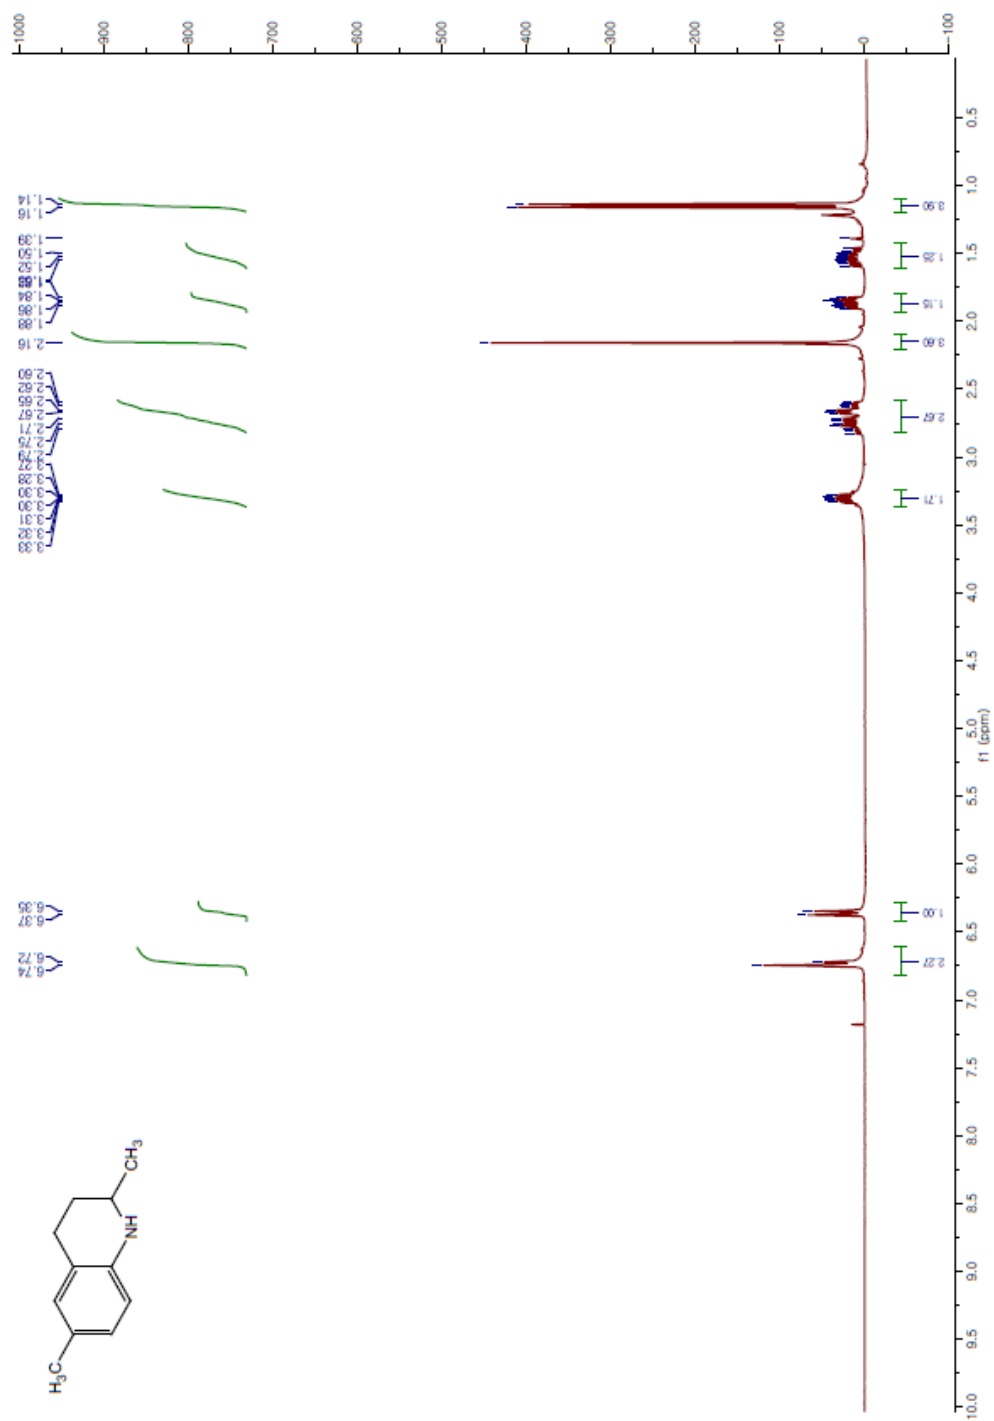

$^{13}\text{C}$  NMR of **14**

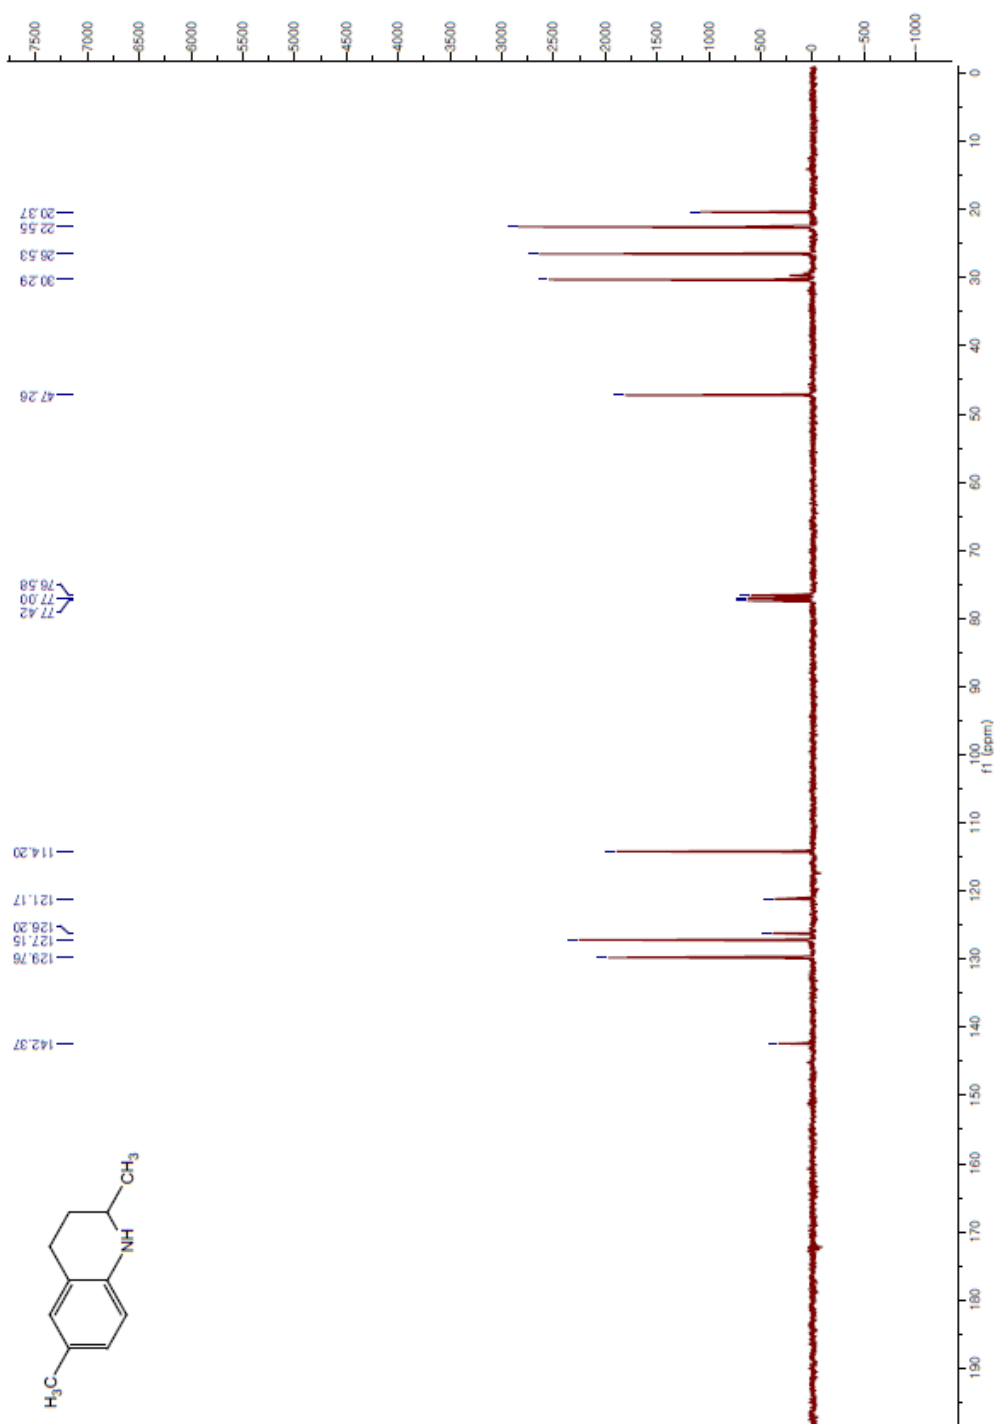

<sup>1</sup>H NMR of 15

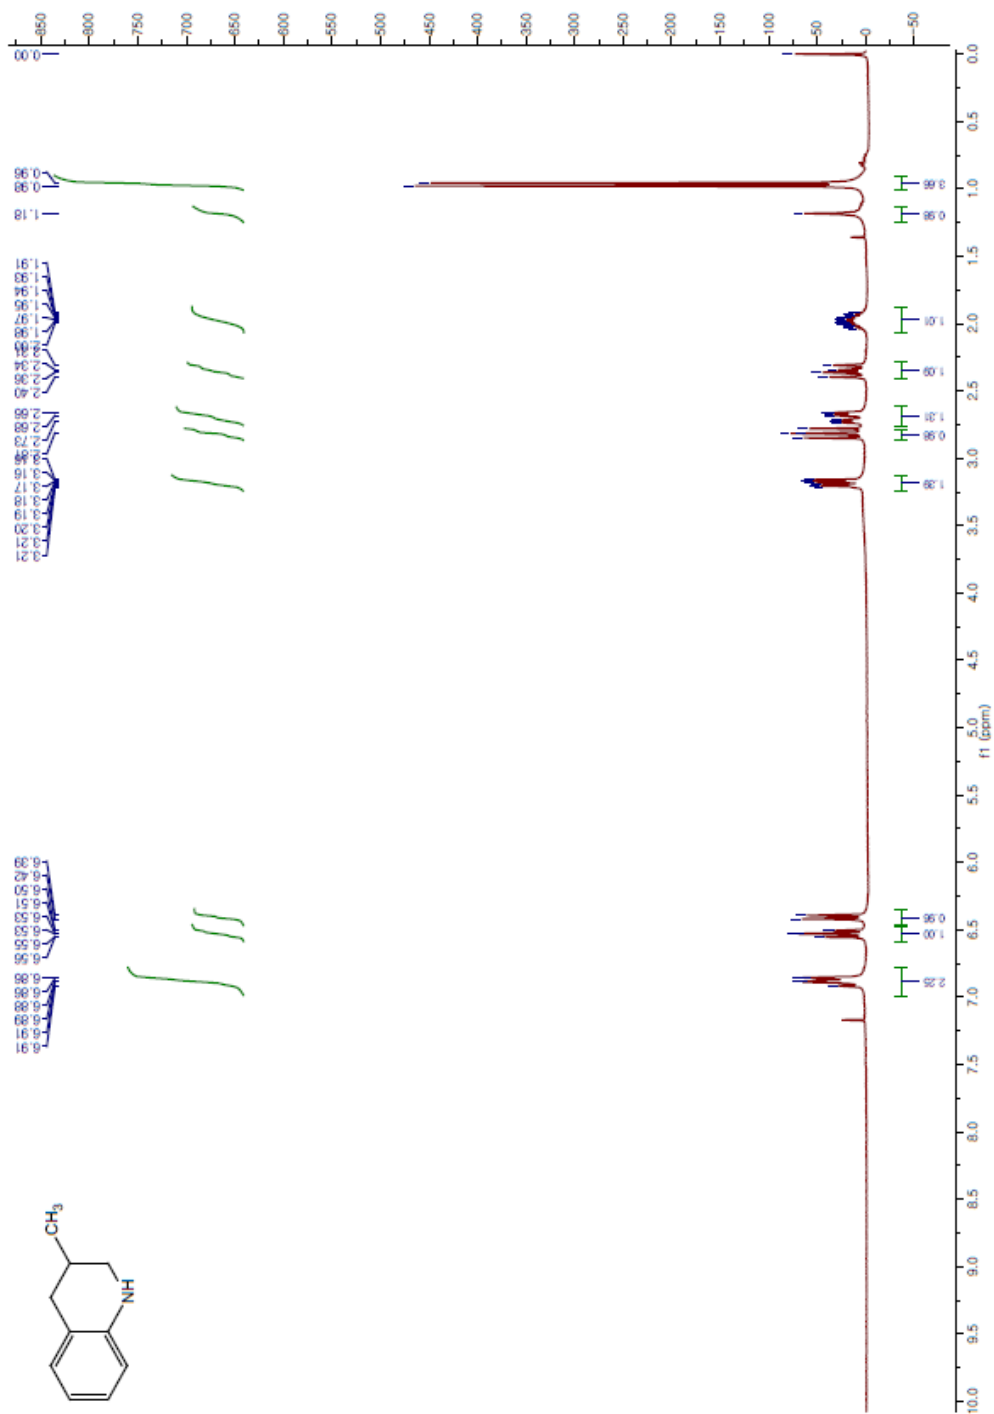

$^{13}\text{C}$  NMR of 15

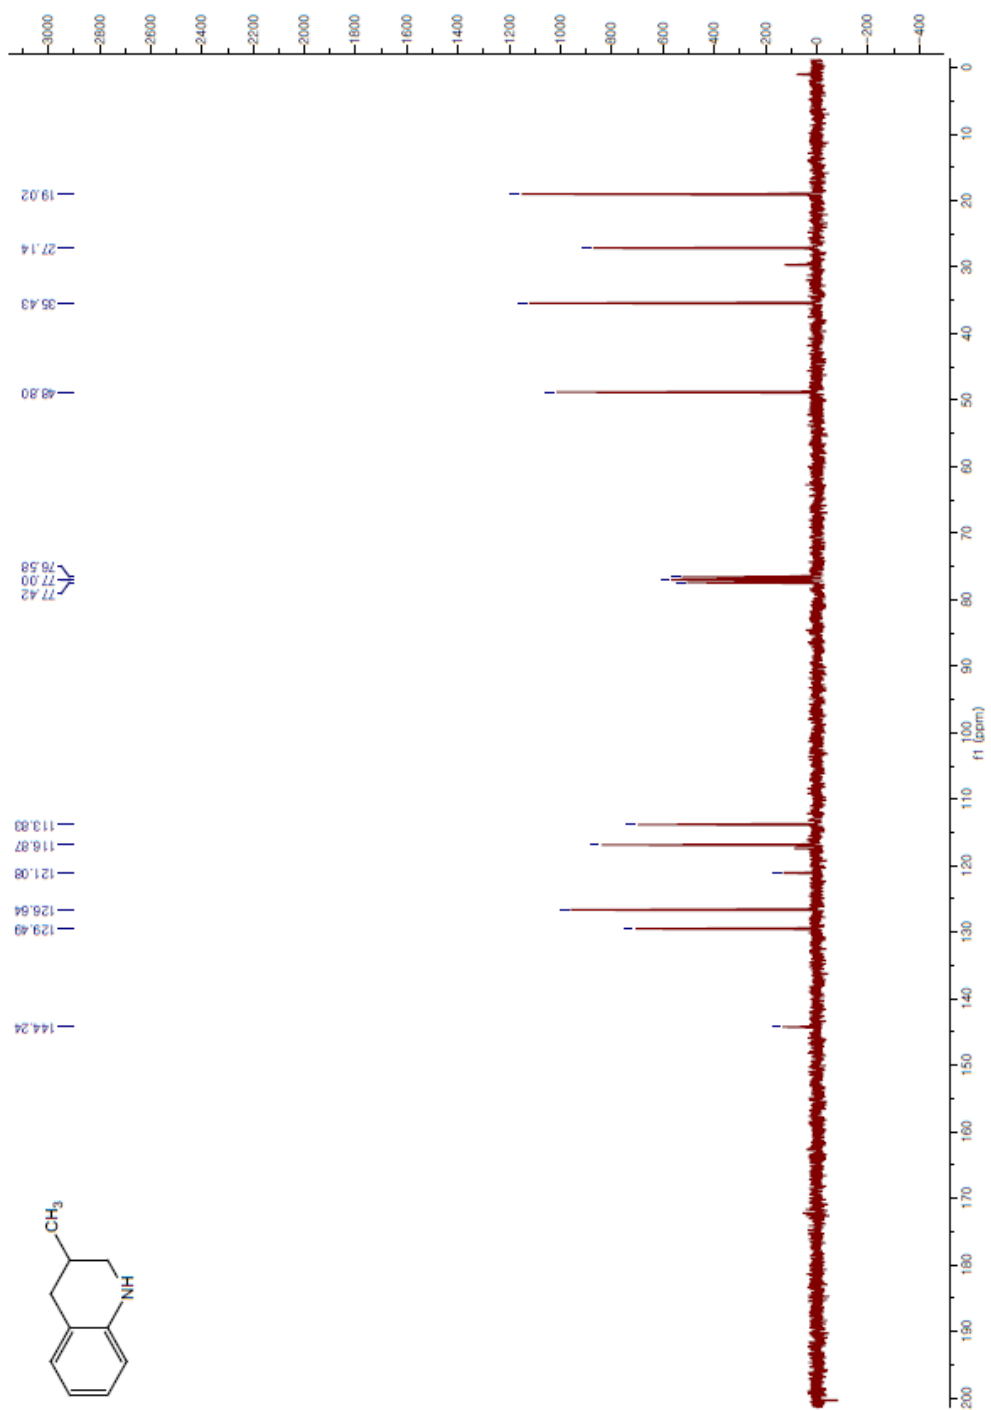

<sup>1</sup>H NMR of 16

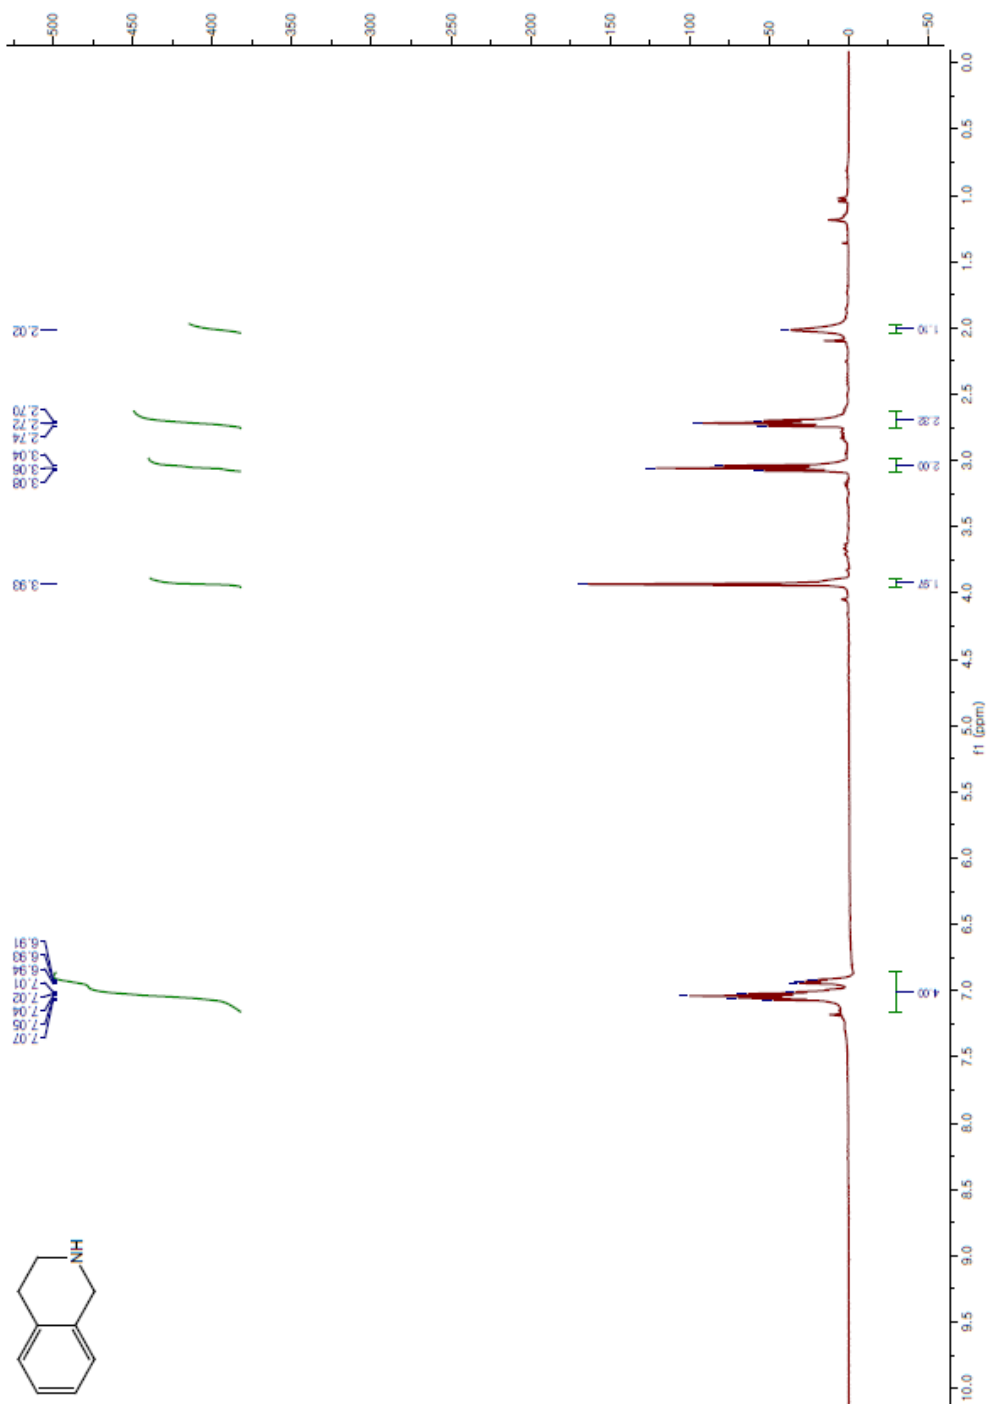



$^{13}\text{C}$  NMR of **16**

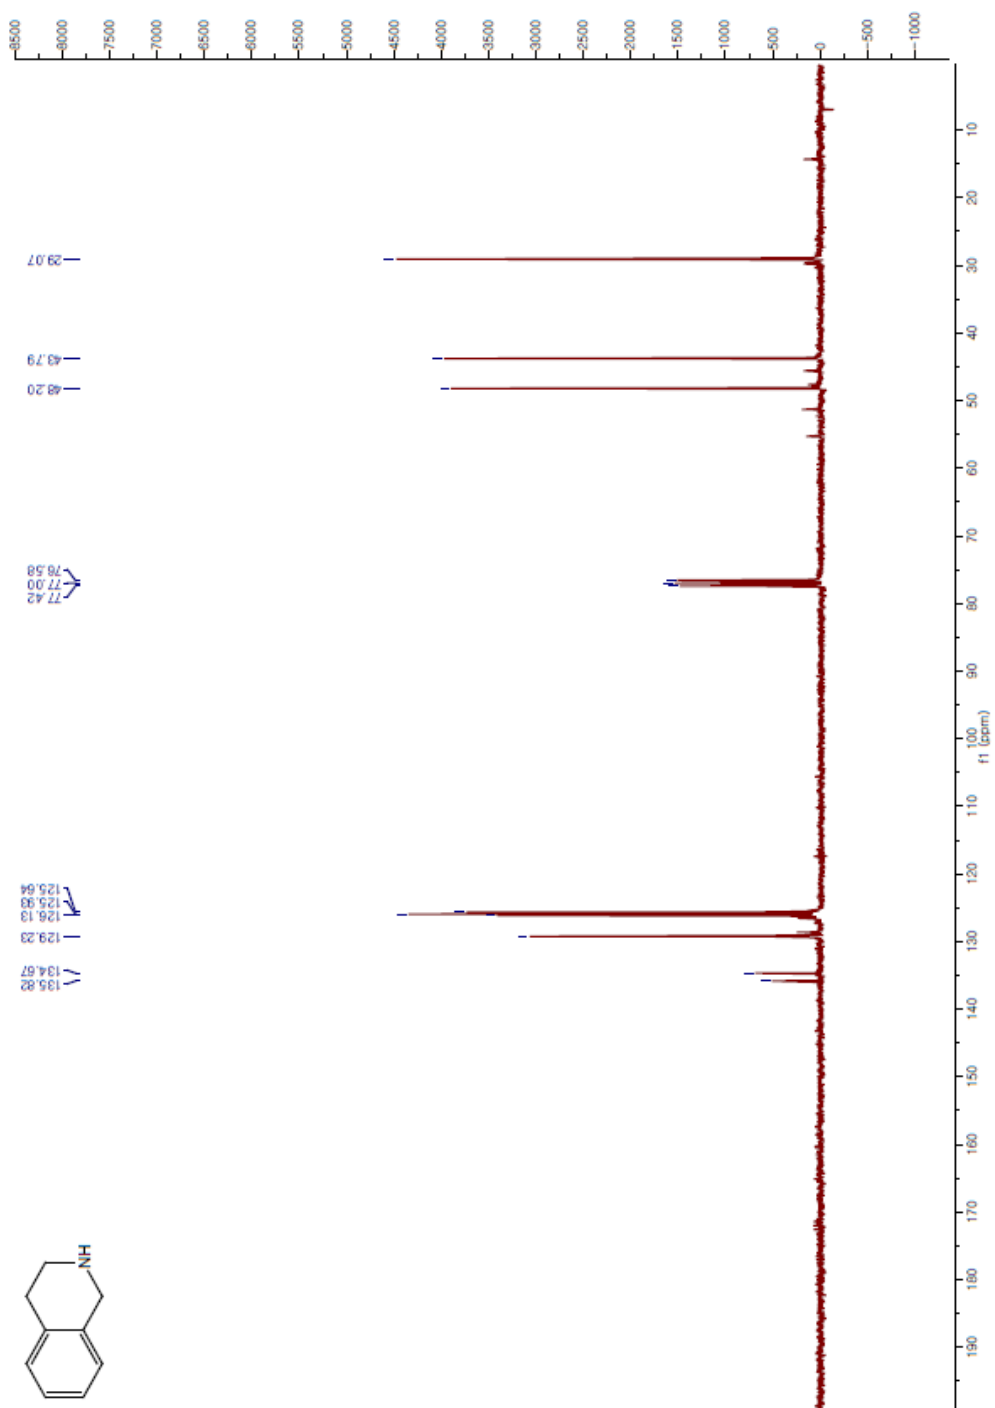

Supplement: c2ob26903a.pdf [file c2ob26903a.pdf]
